# Supplementary material for: Ethnic inequalities in positive SARS-CoV-2 tests, infection prognosis, COVID-19 hospitalisations and deaths: analysis of 2 years of a record linked national cohort study in Scotland
Source: PubMed Central journal article supplement (PMC10511958; doi:10.1136/jech-2023-220501), 2023-07-31
Supplement: jech-2023-220501supp001.pdf [file jech-2023-220501supp001.pdf]

### Supplementary material: Ethnic inequalities in positive SARS-CoV-2 tests, infection prognosis, COVID-19 hospitalisations, and deaths: Analysis of two years of a record linked national cohort study in Scotland

Table S1: Ethnic differences in the risk of COVID-19 related hospitalisations and deaths, hospitalisations, deaths and positive SARS-CoV-2 tests based on 5 aggregated ethnic categories across all waves.

| Variable     | Categories            | Hospitalisations or deaths |                     | Hospitalisations    |                           | Deaths                    |                          | Positive SARS-CoV-2 tests |                   |
|--------------|-----------------------|----------------------------|---------------------|---------------------|---------------------------|---------------------------|--------------------------|---------------------------|-------------------|
|              |                       | Age-sex adjusted           | Plus health board   | Age-sex adjusted    | Plus health board         | Age-sex adjusted          | Plus health board        | Age-sex adjusted          | Plus health board |
|              |                       | HR (95% CI)                | HR (95% CI)         | HR (95% CI)         | HR (95% CI)               | HR (95% CI)               | HR (95% CI)              | HR (95% CI)               | HR (95% CI)       |
| Ethnic group | White                 | 1(ref)                     | 1(ref)              | 1(ref)              | 1(ref)                    | 1(ref)                    | 1(ref)                   | 1(ref)                    | 1(ref)            |
|              | Mixed                 | 1.05 (0.85-1.31)           | 1.04 (0.84-1.29)    | 1.07 (0.86-1.34)    | 1.07 (0.86-1.33)          | 0.90 (0.50-1.63)          | 0.89 (0.49-1.60)         | 0.80 (0.78-0.82)          | 0.79 (0.77-0.81)  |
|              | Asian                 | 1.37 (1.28-1.46)           | 1.26 (1.18-1.34)    | 1.40 (1.31-1.50)    | 1.30 (1.21-1.39)          | 1.36 (1.18-1.57)          | 1.19 (1.03-1.38)         | 0.80 (0.79-0.81)          | 0.77 (0.76-0.78)  |
|              | Black or African      | 1.37 (1.19-1.59)           | 1.35 (1.17-1.56)    | 1.44 (1.24-1.67)    | 1.43 (1.23-1.65)          | 0.60 (0.33-1.08)          | 0.57 (0.32-1.04)         | 0.90 (0.88-0.92)          | 0.88 (0.87-0.90)  |
|              | Other                 | 1.26 (1.06-1.50)           | 1.25 (1.05-1.48)    | 1.32 (1.11-1.57)    | 1.31 (1.10-1.57)          | 0.49 (0.25-0.98)          | 0.48 (0.24-0.95)         | 0.77 (0.75-0.79)          | 0.76 (0.75-0.78)  |
| Age          | 16-20                 | Ref                        | Ref                 | Ref                 | Ref                       | Ref                       | Ref                      | 1 (Ref)                   | 1 (Ref)           |
|              | 21-25                 | 1.23 (1.06-1.42)           | 1.23 (1.06-1.42)    | 1.23 (1.07-1.43)    | 1.23 (1.07-1.43)          | 1.33 (0.52-3.38)          | 1.33 (0.52-3.37)         | 0.91 (0.90-0.92)          | 0.91 (0.90-0.92)  |
|              | 26-30                 | 1.65 (1.44-1.89)           | 1.65 (1.44-1.89)    | 1.67 (1.45-1.91)    | 1.66 (1.45-1.91)          | 1.05 (0.40-2.75)          | 1.04 (0.40-2.73)         | 0.80 (0.79-0.81)          | 0.80 (0.79-0.81)  |
|              | 31-35                 | 2.01 (1.76-2.29)           | 2.00 (1.76-2.29)    | 2.02 (1.76-2.30)    | 2.01 (1.76-2.30)          | 2.55 (1.10-5.89)          | 2.53 (1.09-5.85)         | 0.73 (0.73-0.74)          | 0.73 (0.73-0.74)  |
|              | 36-40                 | 2.55 (2.24-2.90)           | 2.55 (2.24-2.90)    | 2.54 (2.23-2.89)    | 2.54 (2.23-2.90)          | 4.68 (2.11-10.39)         | 4.66 (2.10-10.34)        | 0.74 (0.73-0.74)          | 0.74 (0.73-0.74)  |
|              | 41-45                 | 3.22 (2.84-3.66)           | 3.23 (2.85-3.67)    | 3.18 (2.80-3.62)    | 3.19 (2.81-3.63)          | 9.06 (4.18-19.63)         | 9.06 (4.18-19.63)        | 0.70 (0.69-0.70)          | 0.70 (0.69-0.70)  |
|              | 46-50                 | 4.10 (3.62-4.63)           | 4.10 (3.62-4.64)    | 4.03 (3.56-4.56)    | 4.03 (3.56-4.57)          | 16.55 (7.76-35.27)        | 16.55 (7.76-35.26)       | 0.59 (0.59-0.60)          | 0.59 (0.59-0.60)  |
|              | 51-55                 | 5.53 (4.90-6.23)           | 5.52 (4.89-6.22)    | 5.42 (4.80-6.12)    | 5.41 (4.79-6.11)          | 24.12 (11.38-51.09)       | 24.06 (11.36-50.97)      | 0.52 (0.52-0.53)          | 0.52 (0.52-0.53)  |
|              | 56-60                 | 7.15 (6.35-8.05)           | 7.15 (6.35-8.05)    | 6.96 (6.17-7.85)    | 6.96 (6.17-7.85)          | 43.36 (20.56-91.48)       | 43.33 (20.54-91.41)      | 0.44 (0.43-0.44)          | 0.44 (0.43-0.44)  |
|              | 61-65                 | 8.89 (7.90-10.01)          | 8.94 (7.94-10.07)   | 8.51 (7.55-9.59)    | 8.55 (7.59-9.64)          | 75.17 (35.70-158.26)      | 75.64 (35.92-159.25)     | 0.32 (0.32-0.33)          | 0.32 (0.32-0.33)  |
|              | 66-70                 | 11.32 (10.06-12.74)        | 11.51 (10.22-12.95) | 10.68 (9.48-12.04)  | 10.85 (9.62-12.22)        | 119.44 (56.78-251.25)     | 121.80 (57.90-256.21)    | 0.22 (0.22-0.22)          | 0.22 (0.22-0.22)  |
|              | 71-75                 | 16.70 (14.85-18.78)        | 17.12 (15.23-19.25) | 15.16 (13.47-17.07) | 15.53 (13.79-17.48)       | 228.58 (108.79-480.27)    | 235.47 (112.07-494.74)   | 0.19 (0.19-0.19)          | 0.19 (0.19-0.20)  |
|              | 76-80                 | 26.15 (23.26-29.40)        | 26.82 (23.85-30.14) | 22.46 (19.95-25.29) | 23.00 (20.43-25.90)       | 414.19 (197.19-869.99)    | 426.97 (203.27-896.82)   | 0.20 (0.20-0.20)          | 0.20 (0.20-0.20)  |
|              | 81-85                 | 41.26 (36.71-46.37)        | 42.20 (37.55-47.42) | 32.84 (29.17-36.97) | 33.56 (29.81-37.78)       | 795.32 (378.76-1670.01)   | 816.54 (388.87-1714.57)  | 0.24 (0.23-0.24)          | 0.24 (0.23-0.24)  |
|              | 86-90                 | 61.73 (54.89-69.42)        | 63.40 (56.38-71.31) | 43.28 (38.38-48.80) | 44.44 (39.41-50.11)       | 1423.82 (678.04-2989.90)  | 1467.02 (698.61-3080.61) | 0.31 (0.30-0.32)          | 0.31 (0.31-0.32)  |
| >90          | 75.50 (66.97-85.12)   | 77.90 (69.09-87.83)        | 40.96 (36.11-46.46) | 42.27 (37.26-47.95) | 2169.62 (1032.81-4557.71) | 2245.65 (1069.00-4717.43) | 0.37 (0.36-0.38)         | 0.37 (0.36-0.38)          |                   |
| Sex          | Male                  | Ref                        | Ref                 | Ref                 | Ref                       | Ref                       | Ref                      | Ref                       | Ref               |
|              | Female                | 0.80 (0.79-0.82)           | 0.80 (0.78-0.81)    | 0.80 (0.79-0.82)    | 0.80 (0.78-0.81)          | 0.68 (0.65-0.70)          | 0.67 (0.64-0.69)         | 1.14 (1.14-1.15)          | 1.14 (1.14-1.15)  |
| Health Board | Ayrshire and Arran    |                            | Ref                 |                     | Ref                       |                           | Ref                      |                           | Ref               |
|              | Borders               |                            | 0.57 (0.53-0.62)    |                     | 0.58 (0.53-0.63)          |                           | 0.56 (0.49-0.64)         |                           | 0.74 (0.72-0.75)  |
|              | Dumfries and Galloway |                            | 0.57 (0.53-0.61)    |                     | 0.58 (0.54-0.63)          |                           | 0.43 (0.38-0.49)         |                           | 0.80 (0.78-0.81)  |
|              | Forth Valley          |                            | 0.94 (0.89-0.98)    |                     | 0.91 (0.87-0.96)          |                           | 0.95 (0.87-1.03)         |                           | 1.00 (0.99-1.01)  |
|              | Grampian              |                            | 0.47 (0.44-0.49)    |                     | 0.43 (0.41-0.46)          |                           | 0.50 (0.46-0.54)         |                           | 0.73 (0.72-0.74)  |
|              | Highland              |                            | 0.42 (0.39-0.44)    |                     | 0.38 (0.36-0.41)          |                           | 0.40 (0.36-0.45)         |                           | 0.71 (0.71-0.72)  |
|              | Lothian               |                            | 0.69 (0.66-0.72)    |                     | 0.64 (0.62-0.67)          |                           | 0.76 (0.71-0.82)         |                           | 0.88 (0.87-0.89)  |
|              | Orkney                |                            | 0.28 (0.22-0.35)    |                     | 0.28 (0.22-0.36)          |                           | 0.21 (0.13-0.34)         |                           | 0.44 (0.42-0.46)  |
|              | Shetland              |                            | 0.21 (0.15-0.27)    |                     | 0.18 (0.13-0.25)          |                           | 0.29 (0.19-0.45)         |                           | 0.37 (0.35-0.39)  |
|              | Western Isles         |                            | 0.45 (0.38-0.54)    |                     | 0.48 (0.40-0.57)          |                           | 0.32 (0.22-0.45)         |                           | 0.66 (0.64-0.68)  |
|              | Fife                  |                            | 0.66 (0.62-0.69)    |                     | 0.63 (0.60-0.66)          |                           | 0.67 (0.61-0.73)         |                           | 0.89 (0.88-0.90)  |
| Tayside      |                       | 0.67 (0.63-0.70)           |                     | 0.63 (0.60-0.67)    |                           | 0.72 (0.66-0.78)          |                          | 0.89 (0.88-0.90)          |                   |

|  |                           |  |                  |  |                  |  |                  |  |                  |
|--|---------------------------|--|------------------|--|------------------|--|------------------|--|------------------|
|  | Greater Glasgow and Clyde |  | 1.04 (1.00-1.08) |  | 1.00 (0.96-1.04) |  | 1.15 (1.08-1.22) |  | 1.09 (1.08-1.10) |
|  | Lanarkshire               |  | 1.11 (1.07-1.15) |  | 1.09 (1.04-1.13) |  | 1.19 (1.11-1.27) |  | 1.17 (1.16-1.18) |

HR (95%CI) = Hazard ratio (95% Confidence Interval)

Table S2: Ethnic differences in the risk of COVID-19 related hospitalisations and deaths, hospitalisations, deaths and positive SARS-CoV-2 tests based on 16 disaggregated ethnic subcategories across all waves.

| Variable           | Categories                                              | Hospitalisations and deaths |                     | Hospitalisations    |                     | Deaths                |                       | Positive SARS-CoV-2 tests |                   |
|--------------------|---------------------------------------------------------|-----------------------------|---------------------|---------------------|---------------------|-----------------------|-----------------------|---------------------------|-------------------|
|                    |                                                         | Age-sex adjusted            | Plus health board   | Age-sex adjusted    | Plus health board   | Age-sex adjusted      | Plus health board     | Age-sex adjusted          | Plus health board |
|                    |                                                         | HR (95% CI)                 | HR (95% CI)         | HR (95% CI)         | HR (95% CI)         | HR (95% CI)           | HR (95% CI)           | HR (95% CI)               | HR (95% CI)       |
| Ethnic group       | White Scottish                                          | 1(ref)                      | 1(ref)              | 1(ref)              | 1(ref)              | 1(ref)                | 1(ref)                | 1(ref)                    | 1(ref)            |
|                    | White Other British                                     | 0.58 (0.55-0.60)            | 0.67 (0.64-0.71)    | 0.57 (0.54-0.60)    | 0.67 (0.64-0.71)    | 0.59 (0.55-0.64)      | 0.71 (0.66-0.77)      | 0.71 (0.70-0.71)          | 0.77 (0.76-0.78)  |
|                    | White Irish                                             | 0.91 (0.83-1.01)            | 0.83 (0.76-0.92)    | 0.90 (0.81-1.00)    | 0.82 (0.74-0.92)    | 0.90 (0.77-1.06)      | 0.80 (0.68-0.93)      | 1.01 (0.99-1.04)          | 0.98 (0.96-1.00)  |
|                    | White Gypsy/Traveller                                   | 2.15 (1.55-2.96)            | 2.30 (1.67-3.17)    | 2.34 (1.69-3.25)    | 2.52 (1.82-3.50)    | 1.99 (1.03-3.82)      | 2.10 (1.09-4.04)      | 0.76 (0.70-0.83)          | 0.79 (0.73-0.86)  |
|                    | White Polish                                            | 0.85 (0.72-1.02)            | 0.93 (0.78-1.11)    | 0.87 (0.72-1.04)    | 0.96 (0.80-1.15)    | 0.82 (0.53-1.28)      | 0.87 (0.56-1.35)      | 0.92 (0.91-0.94)          | 0.97 (0.95-0.99)  |
|                    | Other White                                             | 0.66 (0.58-0.74)            | 0.71 (0.62-0.80)    | 0.66 (0.58-0.75)    | 0.71 (0.62-0.81)    | 0.66 (0.52-0.83)      | 0.69 (0.55-0.86)      | 0.68 (0.67-0.70)          | 0.71 (0.70-0.73)  |
|                    | Mixed or multiple ethnic groups                         | 0.79 (0.57-1.10)            | 0.82 (0.59-1.14)    | 0.77 (0.54-1.09)    | 0.80 (0.56-1.14)    | 1.19 (0.66-2.15)      | 1.24 (0.69-2.25)      | 0.79 (0.76-0.82)          | 0.81 (0.78-0.84)  |
|                    | Pakistani Pakistani Scottish or Pakistani British       | 2.41 (2.19-2.65)            | 2.11 (1.92-2.32)    | 2.49 (2.26-2.75)    | 2.20 (1.99-2.43)    | 2.35 (1.95-2.84)      | 1.99 (1.65-2.41)      | 1.06 (1.04-1.08)          | 0.97 (0.95-0.99)  |
|                    | Indian Indian Scottish or Indian British                | 0.89 (0.73-1.09)            | 0.82 (0.67-1.00)    | 0.91 (0.74-1.12)    | 0.85 (0.69-1.04)    | 0.88 (0.60-1.29)      | 0.77 (0.52-1.13)      | 0.89 (0.86-0.92)          | 0.86 (0.83-0.89)  |
|                    | Bangladeshi Bangladeshi Scottish or Bangladeshi British | 1.66 (1.06-2.60)            | 1.84 (1.18-2.89)    | 1.75 (1.11-2.79)    | 2.00 (1.26-3.18)    | 1.07 (0.35-3.32)      | 1.09 (0.35-3.40)      | 0.84 (0.77-0.92)          | 0.90 (0.83-0.98)  |
|                    | Chinese Chinese Scottish or Chinese British             | 0.67 (0.53-0.85)            | 0.65 (0.51-0.82)    | 0.62 (0.48-0.81)    | 0.60 (0.46-0.79)    | 1.10 (0.77-1.57)      | 1.03 (0.73-1.47)      | 0.43 (0.41-0.45)          | 0.43 (0.41-0.45)  |
|                    | Other Asian                                             | 1.26 (1.00-1.58)            | 1.29 (1.03-1.63)    | 1.30 (1.02-1.64)    | 1.35 (1.06-1.70)    | 1.54 (0.97-2.44)      | 1.53 (0.96-2.43)      | 0.88 (0.85-0.91)          | 0.90 (0.87-0.93)  |
|                    | African                                                 | 1.42 (1.14-1.78)            | 1.41 (1.13-1.77)    | 1.51 (1.20-1.89)    | 1.51 (1.21-1.89)    | 0.64 (0.29-1.44)      | 0.62 (0.28-1.37)      | 0.84 (0.81-0.87)          | 0.82 (0.79-0.85)  |
|                    | Caribbean or Black                                      | 0.87 (0.54-1.40)            | 0.90 (0.56-1.45)    | 0.92 (0.56-1.50)    | 0.96 (0.59-1.57)    | 1.01 (0.42-2.44)      | 1.04 (0.43-2.50)      | 0.86 (0.80-0.92)          | 0.86 (0.80-0.92)  |
|                    | Arab Arab Scottish or Arab British                      | 1.41 (1.01-1.97)            | 1.38 (0.99-1.94)    | 1.46 (1.03-2.07)    | 1.45 (1.02-2.05)    | 0.90 (0.37-2.15)      | 0.87 (0.36-2.09)      | 0.76 (0.71-0.80)          | 0.73 (0.69-0.78)  |
| Other Ethnic Group | 1.09 (0.71-1.67)                                        | 1.08 (0.71-1.66)            | 1.16 (0.75-1.79)    | 1.16 (0.75-1.79)    | 0.6 (0.20-1.95)     | 0.61 (0.20-1.91)      | 0.78 (0.72-0.85)      | 0.77 (0.72-0.84)          |                   |
| Age                | 16-20                                                   | Ref                         | Ref                 | Ref                 | Ref                 | Ref                   | Ref                   | Ref                       | Ref               |
|                    | 21-25                                                   | 1.27 (1.08-1.49)            | 1.27 (1.08-1.49)    | 1.28 (1.08-1.50)    | 1.27 (1.08-1.50)    | 1.39 (0.55-3.52)      | 1.38 (0.54-3.50)      | 0.93 (0.92-0.94)          | 0.93 (0.92-0.94)  |
|                    | 26-30                                                   | 1.70 (1.46-1.99)            | 1.69 (1.45-1.97)    | 1.72 (1.47-2.01)    | 1.71 (1.46-1.99)    | 1.16 (0.44-3.05)      | 1.15 (0.44-3.02)      | 0.80 (0.80-0.81)          | 0.81 (0.80-0.81)  |
|                    | 31-35                                                   | 2.09 (1.80-2.43)            | 2.08 (1.79-2.41)    | 2.10 (1.80-2.44)    | 2.08 (1.79-2.42)    | 2.94 (1.27-6.79)      | 2.91 (1.26-6.72)      | 0.73 (0.72-0.74)          | 0.73 (0.72-0.74)  |
|                    | 36-40                                                   | 2.50 (2.16-2.89)            | 2.48 (2.15-2.87)    | 2.48 (2.14-2.88)    | 2.47 (2.13-2.86)    | 5.23 (2.36-11.60)     | 5.19 (2.34-11.50)     | 0.73 (0.73-0.74)          | 0.73 (0.72-0.74)  |
|                    | 41-45                                                   | 3.08 (2.67-3.55)            | 3.08 (2.67-3.55)    | 3.02 (2.62-3.49)    | 3.02 (2.61-3.49)    | 9.61 (4.44-20.82)     | 9.58 (4.42-20.75)     | 0.70 (0.69-0.71)          | 0.70 (0.69-0.71)  |
|                    | 46-50                                                   | 4.06 (3.54-4.65)            | 4.05 (3.53-4.64)    | 3.97 (3.46-4.56)    | 3.96 (3.45-4.55)    | 16.7 (7.84-35.60)     | 16.65 (7.81-35.48)    | 0.60 (0.59-0.60)          | 0.60 (0.59-0.60)  |
|                    | 51-55                                                   | 5.52 (4.83-6.31)            | 5.50 (4.81-6.28)    | 5.39 (4.71-6.17)    | 5.37 (4.69-6.15)    | 23.54 (11.11-49.87)   | 23.41 (11.05-49.60)   | 0.52 (0.52-0.53)          | 0.53 (0.52-0.53)  |
|                    | 56-60                                                   | 7.22 (6.33-8.23)            | 7.20 (6.31-8.21)    | 7.01 (6.13-8.01)    | 6.99 (6.11-7.98)    | 41.55 (19.70-87.65)   | 41.35 (19.60-87.24)   | 0.43 (0.43-0.44)          | 0.44 (0.43-0.44)  |
|                    | 61-65                                                   | 9.13 (8.01-10.41)           | 9.14 (8.02-10.42)   | 8.70 (7.62-9.93)    | 8.71 (7.62-9.94)    | 70.73 (33.59-148.91)  | 70.76 (33.61-148.98)  | 0.32 (0.32-0.32)          | 0.32 (0.32-0.33)  |
|                    | 66-70                                                   | 11.80 (10.35-13.45)         | 11.92 (10.46-13.59) | 11.10 (9.73-12.67)  | 11.21 (9.82-12.80)  | 110.90 (52.72-233.28) | 112.24 (53.36-236.10) | 0.22 (0.22-0.22)          | 0.23 (0.22-0.23)  |
|                    | 71-75                                                   | 17.68 (15.53-20.12)         | 17.98 (15.80-20.47) | 15.99 (14.03-18.24) | 16.26 (14.26-18.54) | 210.80 (100.33-)      | 215.09 (102.38-)      | 0.19 (0.19-0.19)          | 0.20 (0.19-0.20)  |

|              |                           |                     |                     |                     |                     |                          |                          |                  |                  |  |
|--------------|---------------------------|---------------------|---------------------|---------------------|---------------------|--------------------------|--------------------------|------------------|------------------|--|
|              |                           |                     |                     |                     |                     | 442.90)                  | 451.92)                  |                  |                  |  |
|              | 76-80                     | 27.75 (24.39-31.58) | 28.29 (24.86-32.20) | 3.74 (20.82-27.06)  | 24.18 (21.21-27.57) | 377.57 (179.76-793.06)   | 386.32 (183.92-811.44)   | 0.20 (0.19-0.20) | 0.21 (0.20-0.21) |  |
|              | 81-85                     | 43.78 (38.48-49.81) | 44.61 (39.21-50.75) | 34.63 (30.37-39.48) | 35.28 (30.94-40.22) | 720.33 (343.05-1512.52)  | 735.68 (350.36-1544.76)  | 0.23 (0.23-0.24) | 0.25 (0.24-0.25) |  |
|              | 86-90                     | 65.78 (57.78-74.89) | 67.38 (59.18-76.71) | 45.79 (40.11-52.28) | 46.93 (41.10-53.58) | 1282.93 (610.96-2693.99) | 1316.02 (626.71-2763.49) | 0.31 (0.30-0.32) | 0.33 (0.32-0.33) |  |
|              | >90                       | 81.04 (71.02-92.46) | 83.28 (72.99-95.03) | 43.69 (38.06-50.16) | (44.9439.15-51.60)  | 1947.17 (926.94-4090.32) | 2004.42 (954.18-4210.61) | 0.37 (0.36-0.38) | 0.38 (0.37-0.39) |  |
| Sex          | Male                      | Ref                 | Ref                 | Ref                 | Ref                 | Ref                      | Ref                      | Ref              | Ref              |  |
|              | Female                    | 0.80 (0.79-0.82)    | 0.80 (0.78-0.81)    | 0.80 (0.79-0.82)    | 0.80 (0.78-0.81)    | 0.68 (0.65-0.70)         | 0.67 (0.6540.69)         | 1.15 (1.15-1.16) | 1.15 (1.15-1.16) |  |
| Health Board | Ayrshire and Arran        |                     | Ref                 |                     | Ref                 |                          | Ref                      |                  | Ref              |  |
|              | Borders                   |                     | 0.61 (0.56-0.66)    |                     | 0.62 (0.57-0.67)    |                          | 0.57 (0.50-0.66)         |                  | 0.75 (0.73-0.76) |  |
|              | Dumfries and Galloway     |                     | 0.59 (0.55-0.63)    |                     | 0.60 (0.56-0.65)    |                          | 0.46 (0.40-0.52)         |                  | 0.83 (0.82-0.84) |  |
|              | Forth Valley              |                     | 0.94 (0.89-0.98)    |                     | 0.91 (0.86-0.96)    |                          | 0.94 (0.86-1.02)         |                  | 1.00 (0.99-1.01) |  |
|              | Grampian                  |                     | 0.47 (0.45-0.49)    |                     | 0.43 (0.41-0.46)    |                          | 0.50 (0.46-0.55)         |                  | 0.73 (0.73-0.74) |  |
|              | Highland                  |                     | 0.42 (0.40-0.45)    |                     | 0.38 (0.35-0.41)    |                          | 0.41 (0.37-0.46)         |                  | 0.72 (0.71-0.73) |  |
|              | Lothian                   |                     | 0.71 (0.68-0.74)    |                     | 0.66 (0.63-0.69)    |                          | 0.77 (0.72-0.83)         |                  | 0.90 (0.89-0.91) |  |
|              | Orkney                    |                     | 0.29 (0.23-0.38)    |                     | 0.30 (0.23-0.39)    |                          | 0.22 (0.13-0.35)         |                  | 0.46 (0.44-0.48) |  |
|              | Shetland                  |                     | 0.21 (0.16-0.28)    |                     | 0.18 (0.13-0.26)    |                          | 0.29 (0.19-0.45)         |                  | 0.38 (0.36-0.40) |  |
|              | Western Isles             |                     | 0.45 (0.38-0.54)    |                     | 0.48 (0.39-0.57)    |                          | 0.32 (0.22-0.45)         |                  | 0.69 (0.66-0.71) |  |
|              | Fife                      |                     | 0.66 (0.63-0.70)    |                     | 0.63 (0.59-0.67)    |                          | 0.67 (0.61-0.73)         |                  | 0.91 (0.90-0.92) |  |
|              | Tayside                   |                     | 0.67 (0.64-0.70)    |                     | 0.63 (0.60-0.67)    |                          | 0.72 (0.67-0.78)         |                  | 0.89 (0.88-0.89) |  |
|              | Greater Glasgow and Clyde |                     | 1.03 (0.99-1.07)    |                     | 0.98 (0.94-1.02)    |                          | 1.15 (1.08-1.23)         |                  | 1.10 (1.09-1.11) |  |
|              | Lanarkshire               |                     | 1.10 (1.05-1.14)    |                     | 1.07 (1.03-1.12)    |                          | 1.16 (1.09-1.25)         |                  | 1.16 (1.15-1.17) |  |

HR (95%CI) = Hazard ratio (95% Confidence Interval)

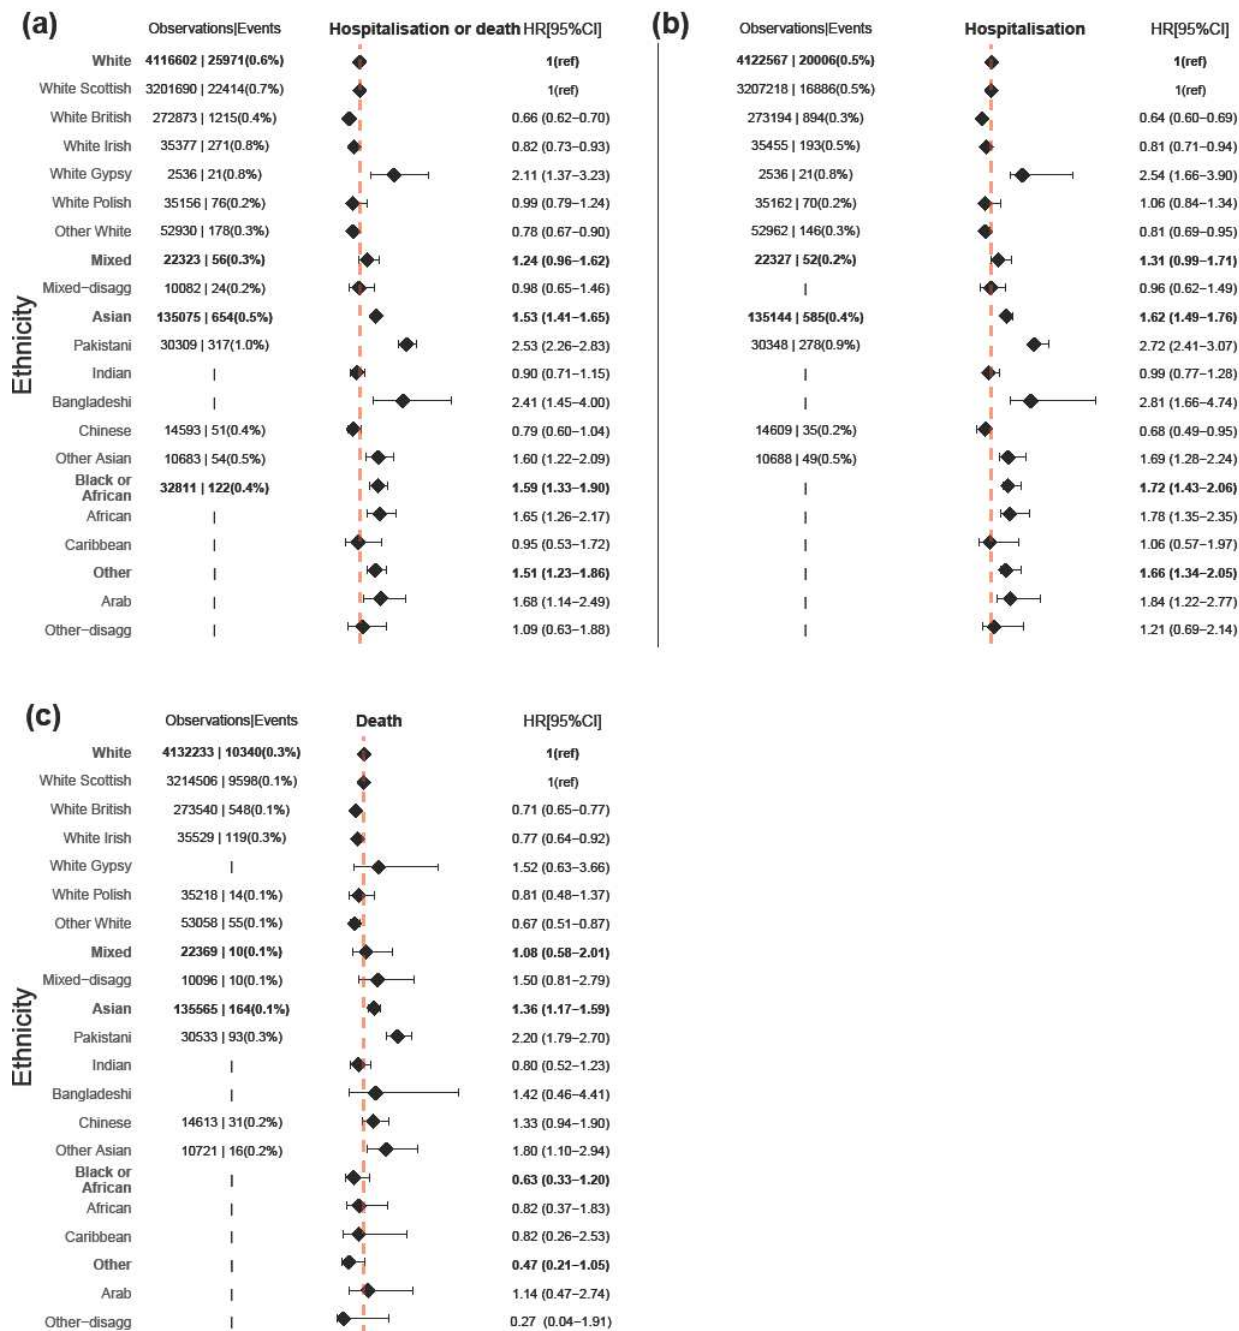

Figure S1: Ethnic differences in the risk of COVID-19 related outcomes for: (a) hospitalisations or deaths, (b) hospitalisation, and (c) deaths where primary position of hospitalisation was only COVID-19.

Models adjusted for age, sex and health board. Bold estimates are for aggregated ethnic groups with White group as the reference category. The non-bold estimates are for disaggregated ethnic groups with White Scottish as the reference category. Data are observations and events, HR (95%CI) = Hazard ratio (95% Confidence Interval). The bold and non-bold HR estimates are not comparable since they are based on different reference categories. Observations and Events for ethnic groups containing small numbers ( $\leq 10$ ) were removed as per data disclosure agreements and indicated by only low numbers not allowable for disclosure release are represented by |.

Table S3: Ethnic differences in the risk of COVID-19 related hospitalisations or deaths, hospitalisations and deaths based on 5 aggregated ethnic categories across all waves where primary position of hospitalisation was only COVID-19.

| Variable     | Categories                | Hospitalisations or deaths |                        | Hospitalisations    |                             | Deaths                      |                            |
|--------------|---------------------------|----------------------------|------------------------|---------------------|-----------------------------|-----------------------------|----------------------------|
|              |                           | Age-sex adjusted           | Plus health board      | Age-sex adjusted    | Plus health board           | Age-sex adjusted            | Plus health board          |
|              |                           | HR (95% CI)                | HR (95% CI)            | HR (95% CI)         | HR (95% CI)                 | HR (95% CI)                 | HR (95% CI)                |
| Ethnic group | White                     | 1(ref)                     | 1(ref)                 | 1(ref)              | 1(ref)                      | 1(ref)                      | 1(ref)                     |
|              | Mixed                     | 1.25 (0.96-1.63)           | 1.24 (0.96-1.62)       | 1.31 (0.99-1.72)    | 1.31 (0.99-1.71)            | 1.10 (0.59-2.05)            | 1.08 (0.58-2.01)           |
|              | Asian                     | 1.68 (1.55-1.81)           | 1.53 (1.41-1.65)       | 1.75 (1.61-1.91)    | 1.62 (1.49-1.76)            | 1.57 (1.35-1.84)            | 1.36 (1.17-1.59)           |
|              | Black or African          | 1.62 (1.36-1.94)           | 1.59 (1.33-1.90)       | 1.73 (1.44-2.07)    | 1.72 (1.43-2.06)            | 0.66 (0.34-1.27)            | 0.63 (0.33-1.20)           |
|              | Other                     | 1.54 (1.25-1.89)           | 1.51 (1.23-1.86)       | 1.67 (1.35-2.06)    | 1.66 (1.34-2.05)            | 0.49 (0.22-1.10)            | 0.47 (0.21-1.05)           |
| Age          | 16-20                     | Ref                        | Ref                    | Ref                 | Ref                         | Ref                         | Ref                        |
|              | 21-25                     | 1.81 (1.41-2.32)           | 1.81 (1.41-2.31)       | 1.80 (1.41-2.31)    | 1.80 (1.41-2.31)            | 2.33 (0.24-22.38)           | 2.32 (0.24-22.28)          |
|              | 26-30                     | 2.59 (2.05-3.28)           | 2.58 (2.05-3.27)       | 2.58 (2.04-3.27)    | 2.58 (2.04-3.26)            | 5.87 (0.73-46.90)           | 5.82 (0.73-46.52)          |
|              | 31-35                     | 3.12 (2.48-3.93)           | 3.11 (2.48-3.91)       | 3.10 (2.46-3.90)    | 3.10 (2.46-3.90)            | 10.71 (1.41-81.06)          | 10.61 (1.40-80.34)         |
|              | 36-40                     | 4.41 (3.53-5.52)           | 4.41 (3.53-5.51)       | 4.32 (3.45-5.41)    | 4.33 (3.46-5.42)            | 22.59 (3.08-165.48)         | 22.46 (3.07-164.51)        |
|              | 41-45                     | 6.15 (4.93-7.66)           | 6.17 (4.95-7.68)       | 5.92 (4.74-7.39)    | 5.94 (4.76-7.42)            | 50.65 (7.02-365.18)         | 50.63 (7.02-365.08)        |
|              | 46-50                     | 7.97 (6.42-9.89)           | 7.97 (6.43-9.89)       | 7.71 (6.20-9.58)    | 7.71 (6.21-9.59)            | 76.16 (10.63-545.67)        | 76.13 (10.62-545.44)       |
|              | 51-55                     | 11.42 (9.23-14.13)         | 11.39 (9.21-14.09)     | 11.00 (8.88-13.63)  | 10.97 (8.86-13.59)          | 126.42 (17.72-902.02)       | 126.06 (17.67-899.43)      |
|              | 56-60                     | 15.08 (12.21-18.63)        | 15.07 (12.20-18.61)    | 14.17 (11.45-17.52) | 14.14 (11.43-17.49)         | 233.61 (32.81-1663.10)      | 233.27 (32.77-1660.72)     |
|              | 61-65                     | 18.54 (15.02-22.90)        | 18.63 (15.09-23.01)    | 17.04 (13.77-21.07) | 17.09 (13.82-21.14)         | 402.10 (56.54-2859.89)      | 404.44 (56.86-2876.51)     |
|              | 66-70                     | 23.83 (19.31-29.42)        | 24.22 (19.62-29.90)    | 21.31 (17.23-26.35) | 21.61 (17.47-26.72)         | 623.68 (87.73-4433.96)      | 636.28 (89.50-4523.53)     |
|              | 71-75                     | 35.64 (28.90-43.95)        | 36.55 (29.64-45.07)    | 30.26 (24.49-37.38) | 30.94 (25.05-38.22)         | 1225.97 (172.55-8710.47)    | 1264.18 (177.93-8981.95)   |
|              | 76-80                     | 56.09 (45.49-69.16)        | 57.52 (46.65-70.92)    | 43.46 (35.18-53.69) | 44.43 (35.96-54.89)         | 2227.27 (313.53-15822.36)   | 2298.50 (323.55-16328.36)  |
|              | 81-85                     | 90.52 (73.43-111.57)       | 92.52 (75.06-114.04)   | 62.67 (50.73-77.43) | 63.87 (51.70-78.92)         | 4329.10 (609.50-30748.49)   | 4447.31 (626.14-31588.08)  |
|              | 86-90                     | 138.01 (111.90-170.21)     | 141.67 (114.87-174.72) | 78.73 (63.61-97.43) | 80.67 (65.19-99.84)         | 7870.60 (1108.09-55903.80)  | 8109.55 (1141.73-57601.02) |
| >90          | 179.18 (145.04-221.37)    | 184.81 (149.59-228.32)     | 70.13 (56.29-87.37)    | 72.24 (57.98-90.00) | 12341.53 (1737.27-87673.79) | 12775.48 (1798.36-90756.62) |                            |
| Sex          | Male                      | Ref                        | Ref                    | Ref                 | Ref                         | Ref                         | Ref                        |
|              | Female                    | 0.79 (0.77-0.81)           | 0.78 (0.76-0.80)       | 0.80 (0.79-0.82)    | 0.79 (0.77-0.82)            | 0.79 (0.77-0.81)            | 0.65 (0.62-0.67)           |
| Health Board | Ayrshire and Arran        |                            | Ref                    |                     | Ref                         |                             | Ref                        |
|              | Borders                   |                            | 0.63 (0.57-0.70)       |                     | 0.68 (0.61-0.76)            |                             | 0.56 (0.48-0.65)           |
|              | Dumfries and Galloway     |                            | 0.59 (0.55-0.65)       |                     | 0.64 (0.59-0.71)            |                             | 0.42 (0.36-0.49)           |
|              | Forth Valley              |                            | 1.11 (1.05-1.18)       |                     | 1.14 (1.07-1.22)            |                             | 0.94 (0.85-1.03)           |
|              | Grampian                  |                            | 0.51 (0.48-0.54)       |                     | 0.48 (0.45-0.52)            |                             | 0.51 (0.46-0.57)           |
|              | Highland                  |                            | 0.41 (0.38-0.44)       |                     | 0.38 (0.34-0.41)            |                             | 0.39 (0.35-0.45)           |
|              | Lothian                   |                            | 0.68 (0.65-0.72)       |                     | 0.61 (0.57-0.65)            |                             | 0.78 (0.72-0.85)           |
|              | Orkney                    |                            | 0.23 (0.16-0.32)       |                     | 0.26 (0.18-0.38)            |                             | 0.12 (0.06-0.25)           |
|              | Shetland                  |                            | 0.24 (0.17-0.33)       |                     | 0.19 (0.12-0.29)            |                             | 0.31 (0.19-0.50)           |
|              | Western Isles             |                            | 0.42 (0.33-0.53)       |                     | 0.48 (0.38-0.61)            |                             | 0.25 (0.16-0.39)           |
|              | Fife                      |                            | 0.65 (0.61-0.69)       |                     | 0.61 (0.56-0.65)            |                             | 0.67 (0.60-0.74)           |
|              | Tayside                   |                            | 0.74 (0.70-0.78)       |                     | 0.72 (0.67-0.77)            |                             | 0.74 (0.67-0.81)           |
|              | Greater Glasgow and Clyde |                            | 1.13 (1.08-1.18)       |                     | 1.08 (1.02-1.13)            |                             | 1.20 (1.11-1.29)           |
|              | Lanarkshire               |                            | 1.15 (1.10-1.21)       |                     | 1.12 (1.06-1.19)            |                             | 1.19 (1.10-1.29)           |

HR (95%CI) = Hazard ratio (95% Confidence Interval)

Table S4: Ethnic differences in the risk of COVID-19 related hospitalisations and deaths, hospitalisations, deaths, and positive SARS-CoV-2 tests based on 16 disaggregated ethnic subcategories across all waves where primay position of hospitalisation was only COVID-19.

| Variable     | Categories            | Hospitalisations or deaths |                        | Hospitalisations     |                      | Deaths                    |                           |
|--------------|-----------------------|----------------------------|------------------------|----------------------|----------------------|---------------------------|---------------------------|
|              |                       | Age-sex adjusted           | Plus health board      | Age-sex adjusted     | Plus health board    | Age-sex adjusted          | Plus health board         |
|              |                       | HR (95% CI)                | HR (95% CI)            | HR (95% CI)          | HR (95% CI)          | HR (95% CI)               | HR (95% CI)               |
| Ethnic group | White Scottish        | 1(ref)                     | 1(ref)                 | 1(ref)               | 1(ref)               | 1(ref)                    | 1(ref)                    |
|              | White Other British   | 0.56 (0.53-0.59)           | 0.66 (0.62-0.70)       | 0.55 (0.51-0.58)     | 0.64 (0.60-0.69)     | 0.59 (0.54-0.64)          | 0.71 (0.65-0.77)          |
|              | White Irish           | 0.91 (0.81-1.02)           | 0.82 (0.73-0.93)       | 0.89 (0.77-1.02)     | 0.81 (0.71-0.94)     | 0.88 (0.73-1.05)          | 0.77 (0.64-0.92)          |
|              | White Gypsy/Traveller | 1.98 (1.29-3.04)           | 2.11 (1.37-3.23)       | 2.38 (1.55-3.65)     | 2.54 (1.66-3.90)     | 1.44 (0.60-3.47)          | 1.52 (0.63-3.66)          |
|              | White Polish          | 0.91 (0.72-1.14)           | 0.99 (0.79-1.24)       | 0.95 (0.75-1.21)     | 1.06 (0.84-1.34)     | 0.76 (0.45-1.29)          | 0.81 (0.48-1.37)          |
|              | Other White           | 0.72 (0.62-0.84)           | 0.78 (0.67-0.90)       | 0.74 (0.63-0.87)     | 0.81 (0.69-0.95)     | 0.64 (0.49-0.83)          | 0.67 (0.51-0.87)          |
|              | Mixed - disaggregate  | 0.93 (0.63-1.39)           | 0.98 (0.65-1.46)       | 0.91 (0.58-1.40)     | 0.96 (0.62-1.49)     | 1.44 (0.78-2.68)          | 1.50 (0.81-2.79)          |
|              | Pakistani             | 2.92 (2.61-3.26)           | 2.53 (2.26-2.83)       | 3.10 (2.75-3.49)     | 2.72 (2.41-3.07)     | 2.63 (2.14-3.23)          | 2.20 (1.79-2.70)          |
|              | Indian                | 0.99 (0.78-1.26)           | 0.90 (0.71-1.15)       | 1.07 (0.83-1.38)     | 0.99 (0.77-1.28)     | 0.93 (0.60-1.42)          | 0.80 (0.52-1.23)          |
|              | Bangladeshi           | 2.17 (1.31-3.60)           | 2.41 (1.45-4.00)       | 2.43 (1.44-4.10)     | 2.81 (1.66-4.74)     | 1.40 (0.45-4.35)          | 1.42 (0.46-4.41)          |
|              | Chinese               | 0.82 (0.62-1.08)           | 0.79 (0.60-1.04)       | 0.70 (0.50-0.97)     | 0.68 (0.49-0.95)     | 1.44 (1.01-2.04)          | 1.33 (0.94-1.90)          |
|              | Other Asian           | 1.56 (1.20-2.04)           | 1.60 (1.22-2.09)       | 1.63 (1.23-2.15)     | 1.69 (1.28-2.24)     | 1.83 (1.12-2.98)          | 1.80 (1.10-2.94)          |
|              | African               | 1.68 (1.28-2.20)           | 1.65 (1.26-2.17)       | 1.78 (1.34-2.35)     | 1.78 (1.35-2.35)     | 0.87 (0.39-1.93)          | 0.82 (0.37-1.83)          |
|              | Caribbean             | 0.92 (0.51-1.66)           | 0.95 (0.53-1.72)       | 1.00 (0.54-1.87)     | 1.06 (0.57-1.97)     | 0.80 (0.26-2.47)          | 0.82 (0.26-2.53)          |
|              | Arab                  | 1.72 (1.16-2.54)           | 1.68 (1.14-2.49)       | 1.85 (1.23-2.79)     | 1.84 (1.22-2.77)     | 1.18 (0.49-2.84)          | 1.14 (0.47-2.74)          |
|              | Other -disaggregate   | 1.10 (0.64-1.90)           | 1.09 (0.63-1.88)       | 1.21 (0.69-2.13)     | 1.21 (0.69-2.14)     | 0.28 (0.04-1.96)          | 0.27 (0.04-1.91)          |
| Age          | 16-20                 | Ref                        | Ref                    | Ref                  | Ref                  | Ref                       | Ref                       |
|              | 21-25                 | 1.98 (1.49-2.62)           | 1.97 (1.49-2.61)       | 1.97 (1.49-2.61)     | 1.97 (1.48-2.61)     | 2.43 (0.25-23.36)         | 2.42 (0.25-23.23)         |
|              | 26-30                 | 2.90 (2.22-3.78)           | 2.87 (2.20-3.75)       | 2.88 (2.20-3.77)     | 2.86 (2.19-3.75)     | 6.51 (0.81-52.09)         | 6.44 (0.80-51.46)         |
|              | 31-35                 | 3.47 (2.67-4.51)           | 3.44 (2.65-4.47)       | 3.44 (2.64-4.48)     | 3.41 (2.62-4.45)     | 12.37 (1.63-93.63)        | 12.21 (1.61-92.44)        |
|              | 36-40                 | 4.58 (3.55-5.92)           | 4.55 (3.53-5.88)       | 4.44 (3.43-5.75)     | 4.42 (3.41-5.72)     | 25.31 (3.45-185.41)       | 25.06 (3.42-183.58)       |
|              | 41-45                 | 6.23 (4.85-8.02)           | 6.23 (4.84-8.01)       | 5.91 (4.58-7.62)     | 5.91 (4.58-7.62)     | 53.76 (7.46-387.61)       | 53.57 (7.43-386.25)       |
|              | 46-50                 | 8.30 (6.49-10.62)          | 8.29 (6.48-10.60)      | 7.96 (6.21-10.20)    | 7.95 (6.20-10.19)    | 76.79 (10.72-550.19)      | 76.52 (10.68-548.25)      |
|              | 51-55                 | 12.22 (9.59-15.56)         | 12.17 (9.55-15.50)     | 11.69 (9.16-14.92)   | 11.64 (9.12-14.86)   | 123.12 (17.26-878.50)     | 122.44 (17.16-873.64)     |
|              | 56-60                 | 16.17 (12.71-20.57)        | 16.12 (12.67-20.50)    | 15.05 (11.81-19.19)  | 15.01 (11.77-19.13)  | 223.27 (31.36-1589.46)    | 222.06 (31.19-1580.88)    |
|              | 61-65                 | 20.10 (15.81-25.55)        | 20.12 (15.82-25.58)    | 18.29 (14.36-23.31)  | 18.31 (14.37-23.33)  | 377.34 (53.05-2683.71)    | 377.33 (53.05-2683.66)    |
|              | 66-70                 | 26.23 (20.64-33.34)        | 26.52 (20.86-33.70)    | 23.26 (18.26-29.63)  | 23.49 (18.44-29.92)  | 578.09 (81.32-4109.81)    | 585.24 (82.32-4160.65)    |
|              | 71-75                 | 40.01 (31.51-50.79)        | 40.73 (32.08-51.71)    | 33.73 (26.51-42.93)  | 34.29 (26.95-43.63)  | 1127.20 (158.65-8008.60)  | 1151.04 (162.01-8177.98)  |
|              | 76-80                 | 63.17 (49.76-80.18)        | 64.44 (50.77-81.80)    | 48.58 (38.18-61.82)  | 49.46 (38.87-62.95)  | 2023.76 (284.88-14376.46) | 2072.54 (291.75-14723.00) |
|              | 81-85                 | 101.69 (80.13-129.04)      | 103.61 (81.64-131.48)  | 69.67 (54.74-88.65)  | 70.88 (55.70-90.19)  | 3906.22 (549.97-27744.53) | 3991.24 (561.93-28348.45) |
|              | 86-90                 | 155.49 (122.48-197.42)     | 159.25 (125.43-202.18) | 87.65 (68.77-111.71) | 89.75 (70.42-114.38) | 7062.89 (50166.12)        | 7245.08 (51460.30)        |
|              | >90                   | 202.83 (159.52-257.90)     | 208.52 (163.99-265.13) | 78.44 (61.17-100.57) | 80.65 (62.90-103.41) | 11033.28 (78379.02)       | 11358.19 (80687.47)       |
| Sex          | Male                  | Ref                        | Ref                    | Ref                  | Ref                  | Ref                       | Ref                       |
|              | Female                | 0.78 (0.76-0.80)           | 0.77 (0.75-0.79)       | 0.79 (0.77-0.81)     | 0.78 (0.76-0.80)     | 0.66 (0.63-0.68)          | 0.65 (0.62-0.67)          |
| Health Board | Ayrshire and Arran    |                            | Ref                    |                      | Ref                  |                           | Ref                       |
|              | Borders               |                            | 0.67 (0.60-0.73)       |                      | 0.73 (0.65-0.81)     |                           | 0.57 (0.49-0.67)          |
|              | Dumfries and Galloway |                            | 0.62 (0.57-0.68)       |                      | 0.68 (0.61-0.75)     |                           | 0.45 (0.38-0.52)          |
|              | Forth Valley          |                            | 1.11 (1.04-1.18)       |                      | 1.15 (1.07-1.23)     |                           | 0.93 (0.84-1.03)          |

|  |                           |  |                  |  |                  |  |                  |
|--|---------------------------|--|------------------|--|------------------|--|------------------|
|  | Grampian                  |  | 0.51 (0.48-0.55) |  | 0.48 (0.45-0.52) |  | 0.51 (0.47-0.57) |
|  | Highland                  |  | 0.42 (0.38-0.45) |  | 0.38 (0.34-0.42) |  | 0.41 (0.36-0.46) |
|  | Lothian                   |  | 0.70 (0.66-0.74) |  | 0.63 (0.59-0.67) |  | 0.78 (0.72-0.85) |
|  | Orkney                    |  | 0.24 (0.17-0.34) |  | 0.28 (0.19-0.40) |  | 0.12 (0.06-0.26) |
|  | Shetland                  |  | 0.25 (0.18-0.35) |  | 0.20 (0.13-0.31) |  | 0.31 (0.19-0.50) |
|  | Western Isles             |  | 0.39 (0.31-0.50) |  | 0.45 (0.34-0.58) |  | 0.25 (0.16-0.39) |
|  | Fife                      |  | 0.65 (0.61-0.70) |  | 0.61 (0.56-0.66) |  | 0.67 (0.61-0.74) |
|  | Tayside                   |  | 0.74 (0.70-0.79) |  | 0.71 (0.67-0.77) |  | 0.74 (0.68-0.81) |
|  | Greater Glasgow and Clyde |  | 1.12 (1.07-1.18) |  | 1.07 (1.01-1.12) |  | 1.20 (1.11-1.29) |
|  | Lanarkshire               |  | 1.14 (1.08-1.20) |  | 1.11 (1.04-1.17) |  | 1.17 (1.08-1.27) |

HR (95%CI) = Hazard ratio (95% Confidence Interval)

Table S5: Ethnic differences in the risk of COVID-19 related hospitalisations and deaths, hospitalisations and deaths based on 5 aggregated ethnic categories across waves following a confirmed positive SARS-CoV-2 test and confirmed COVID-19 hospitalisation.

| Variable     | Categories             | Confirmed positive SARS-CoV-2 test |                        |                        |                           |                           |                          | COVID-19 hospitalisation |                      |
|--------------|------------------------|------------------------------------|------------------------|------------------------|---------------------------|---------------------------|--------------------------|--------------------------|----------------------|
|              |                        | Hospitalisations and deaths        |                        | Hospitalisations       |                           | Deaths                    |                          | Deaths                   |                      |
|              |                        | Age-sex adjusted                   | Plus health board      | Age-sex adjusted       | Plus health board         | Age-sex adjusted          | Plus health board        | Age-sex adjusted         | Plus health board    |
|              |                        | HR (95% CI)                        | HR (95% CI)            | HR (95% CI)            | HR (95% CI)               | HR (95% CI)               | HR (95% CI)              | HR (95% CI)              | HR (95% CI)          |
| Ethnic group | White                  | 1(ref)                             | 1(ref)                 | 1(ref)                 | 1(ref)                    | 1(ref)                    | 1(ref)                   | 1(ref)                   | 1(ref)               |
|              | Mixed                  | 1.24 (0.99-1.54)                   | 1.25 (1.00-1.56)       | 1.28 (1.02-1.61)       | 1.30 (1.03-1.63)          | 0.98 (0.53-1.83)          | 0.97 (0.52-1.81)         | 0.86 (0.41-1.80)         | 0.85 (0.40-1.78)     |
|              | Asian                  | 1.37 (1.28-1.47)                   | 1.34 (1.25-1.44)       | 1.42 (1.32-1.52)       | 1.39 (1.29-1.49)          | 1.22 (1.05-1.42)          | 1.17 (1.01-1.37)         | 1.07 (0.89-1.28)         | 1.04 (0.87-1.24)     |
|              | Black or African       | 1.46 (1.26-1.70)                   | 1.49 (1.28-1.72)       | 1.54 (1.32-1.79)       | 1.57 (1.35-1.82)          | 0.64 (0.35-1.15)          | 0.63 (0.35-1.13)         | 0.58 (0.30-1.11)         | 0.56 (0.29-1.08)     |
|              | Other                  | 1.35 (1.13-1.62)                   | 1.37 (1.14-1.64)       | 1.46 (1.22-1.74)       | 1.48 (1.24-1.77)          | 0.36 (0.16-0.79)          | 0.63 (0.16-0.79)         | 0.36 (0.15-0.86)         | 0.37 (0.15-0.88)     |
| Age          | 16-20                  | Ref                                | Ref                    | Ref                    | Ref                       | Ref                       | Ref                      | Ref                      | Ref                  |
|              | 21-25                  | 1.28 (1.10-1.48)                   | 1.27 (1.10-1.48)       | 1.28 (1.10-1.49)       | 1.28 (1.10-1.49)          | 1.24 (0.44-3.48)          | 1.23 (0.44-3.47)         | 1.94 (0.39-9.62)         | 1.92 (0.39-9.51)     |
|              | 26-30                  | 1.87 (1.62-2.15)                   | 1.86 (1.61-2.14)       | 1.88 (1.63-2.17)       | 1.87 (1.62-2.16)          | 1.13 (0.39-3.27)          | 1.13 (0.39-3.25)         | 0.88 (0.16-4.78)         | 0.87 (0.16-4.76)     |
|              | 31-35                  | 2.50 (2.18-2.86)                   | 2.48 (2.17-2.85)       | 2.49 (2.17-2.86)       | 2.48 (2.16-2.85)          | 3.43 (1.40-8.42)          | 3.41 (1.39-8.36)         | 2.28 (0.51-10.09)        | 2.25 (0.51-9.98)     |
|              | 36-40                  | 3.13 (2.74-3.58)                   | 3.12 (2.73-3.56)       | 3.13 (2.74-3.58)       | 3.11 (2.72-3.56)          | 5.48 (2.31-13.02)         | 5.45 (2.30-12.94)        | 3.44 (0.81-14.56)        | 3.41 (0.81-14.44)    |
|              | 41-45                  | 4.14 (3.63-4.73)                   | 4.14 (3.63-4.72)       | 4.08 (3.57-4.65)       | 4.07 (3.56-4.64)          | 11.93 (5.18-27.50)        | 11.88 (5.16-27.38)       | 5.62 (1.36-23.20)        | 5.55 (1.35-22.89)    |
|              | 46-50                  | 5.87 (5.16-6.67)                   | 5.82 (5.13-6.62)       | 5.77 (5.07-6.56)       | 5.72 (5.03-6.51)          | 24.51 (10.82-55.50)       | 24.34 (10.75-55.11)      | 9.36 (2.31-37.91)        | 9.24 (2.28-37.45)    |
|              | 51-55                  | 8.85 (7.82-10.02)                  | 8.74 (7.72-9.90)       | 8.68 (7.66-9.84)       | 8.56 (7.55-9.71)          | 40.04 (17.80-90.08)       | 39.61 (17.61-89.10)      | 10.15 (2.52-40.91)       | 9.93 (2.46-40.02)    |
|              | 56-60                  | 13.39 (11.84-15.15)                | 13.20 (11.67-14.92)    | 12.96 (11.45-14.67)    | 12.74 (11.25-14.42)       | 87.08 (38.89-194.98)      | 85.91 (38.37-192.36)     | 15.58 (3.88-62.55)       | 15.29 (3.81-61.40)   |
|              | 61-65                  | 21.95 (19.42-24.82)                | 21.64 (19.14-24.46)    | 20.81 (18.39-23.56)    | 20.47 (18.09-23.16)       | 197.55 (88.41-441.41)     | 195.11 (87.32-435.95)    | 22.59 (5.63-90.59)       | 22.21 (5.54-89.05)   |
|              | 66-70                  | 39.74 (35.17-44.91)                | 39.32 (34.79-44.43)    | 36.73 (32.46-41.56)    | 36.26 (32.04-41.03)       | 442.04 (198.01-986.79)    | 438.46 (196.41-978.80)   | 29.71 (7.41-119.05)      | 29.30 (7.31-117.41)  |
|              | 71-75                  | 69.90 (61.93-78.90)                | 69.20 (61.31-78.11)    | 61.47 (54.39-69.48)    | 60.75 (53.75-68.66)       | 992.00 (444.92-2211.78)   | 983.48 (441.10-2192.78)  | 39.72 (9.92-159.01)      | 39.19 (9.79-156.93)  |
|              | 76-80                  | 110.16 (97.61-124.32)              | 108.58 (96.21-122.54)  | 90.06 (79.67-101.79)   | 88.57 (78.35-100.11)      | 1756.89 (788.19-3916.13)  | 1735.60 (778.64-3868.69) | 43.37 (10.83-173.62)     | 42.74 (10.67-171.09) |
| 81-85        | 153.14 (135.73-172.80) | 151.26 (134.06-170.67)             | 113.09 (100.05-127.85) | 111.49 (98.62-126.03)  | 2998.06 (1345.45-6680.55) | 2964.28 (1330.29-6605.30) | 53.48 (13.36-214.07)     | 52.60 (13.14-210.54)     |                      |
| 86-90        | 178.76 (158.29-201.89) | 177.84 (157.56-200.96)             | 114.50 (101.09-129.68) | 113.88 (100.55-128.98) | 4316.60 (1937.01-9619.46) | 4297.38 (1928.39-9576.64) | 63.90 (15.96-255.84)     | 63.14 (15.77-252.80)     |                      |

|              |                           |                        |                        |                      |                      |                            |                            |                      |                      |
|--------------|---------------------------|------------------------|------------------------|----------------------|----------------------|----------------------------|----------------------------|----------------------|----------------------|
|              | >90                       | 185.54 (163.79-210.18) | 185.77 (163.99-210.45) | 89.67 (78.59-102.32) | 89.81 (78.71-102.48) | 5984.85 (2684.35-13343.44) | 5988.09 (2685.80-13350.66) | 81.46 (20.33-326.45) | 80.32 (20.04-321.91) |
| Sex          | Male                      | Ref                    | Ref                    | Ref                  | Ref                  | Ref                        | Ref                        | Ref                  | Ref                  |
|              | Female                    | 0.78 (0.76-079)        | 0.78 (0.76-0.79)       | 0.79 (0.77-0.81)     | 0.79 (0.77-0.81)     | 0.65 (0.63-0.68)           | 0.65 (0.63-0.67)           | 0.73 (0.70-0.77)     | 0.73 (0.70-0.77)     |
| Health Board | Ayrshire and Arran        |                        | Ref                    |                      | Ref                  |                            | Ref                        |                      | Ref                  |
|              | Borders                   |                        | 0.82 (0.76-0.90)       |                      | 0.86 (0.78-0.94)     |                            | 0.81 (0.70-0.94)           |                      | 0.95 (0.79-1.13)     |
|              | Dumfries and Galloway     |                        | 0.89 (0.83-0.95)       |                      | 0.94 (0.87-1.01)     |                            | 0.67 (0.59-0.78)           |                      | 0.73 (0.61-0.88)     |
|              | Forth Valley              |                        | 0.88 (0.84-0.93)       |                      | 0.89 (0.84-0.94)     |                            | 0.90 (0.82-0.99)           |                      | 0.90 (0.80-1.01)     |
|              | Grampian                  |                        | 0.66 (0.63-0.70)       |                      | 0.65 (0.61-0.69)     |                            | 0.68 (0.62-0.75)           |                      | 0.84 (0.74-0.94)     |
|              | Highland                  |                        | 0.68 (0.63-0.72)       |                      | 0.65 (0.61-0.70)     |                            | 0.65 (0.58-0.73)           |                      | 0.66 (0.55-0.78)     |
|              | Lothian                   |                        | 0.76 (0.73-0.80)       |                      | 0.73 (0.70-0.77)     |                            | 0.84 (0.78-0.90)           |                      | 0.86 (0.79-0.95)     |
|              | Orkney                    |                        | 0.79 (0.61-1.02)       |                      | 0.83 (0.63-1.09)     |                            | 0.61 (0.36-1.03)           |                      | 0.88 (0.46-1.70)     |
|              | Shetland                  |                        | 0.69 (0.51-0.93)       |                      | 0.59 (0.42-0.84)     |                            | 1.10 (0.70-1.74)           |                      | 1.72 (0.92-3.21)     |
|              | Western Isles             |                        | 0.69 (0.58-0.83)       |                      | 0.73 (0.60-0.89)     |                            | 0.49 (0.35-0.71)           |                      | 0.66 (0.42-1.04)     |
|              | Fife                      |                        | 0.77 (0.73-0.81)       |                      | 0.76 (0.72-0.81)     |                            | 0.75 (0.68-0.82)           |                      | 0.89 (0.79-1.01)     |
|              | Tayside                   |                        | 0.83 (0.79-0.87)       |                      | 0.82 (0.78-0.87)     |                            | 0.88 (0.81-0.96)           |                      | 0.94 (0.84-1.05)     |
|              | Greater Glasgow and Clyde |                        | 0.95 (0.92-0.99)       |                      | 0.97 (0.93-1.01)     |                            | 0.95 (0.89-1.02)           |                      | 1.00 (0.93-1.09)     |
| Lanarkshire  |                           | 0.99 (0.95-1.03)       |                        | 1.00 (0.96-1.05)     |                      | 0.99 (0.92-1.07)           |                            | 1.03 (0.94-1.12)     |                      |

Table S6: Ethnic differences in the risk of COVID-19 related hospitalisations and deaths, hospitalisations and deaths based on 16 disaggregated ethnic subcategories across waves following a confirmed positive SARS-CoV-2 test and COVID-19 hospitalisation.

| Variable     | Categories                                              | Positive SARS-CoV-2 test    |                   |                  |                   |                         |                   | COVID-19 hospitalisation |                   |
|--------------|---------------------------------------------------------|-----------------------------|-------------------|------------------|-------------------|-------------------------|-------------------|--------------------------|-------------------|
|              |                                                         | Hospitalisations and deaths |                   | Hospitalisations |                   | Deaths                  |                   | Deaths                   |                   |
|              |                                                         | Age-sex adjusted            | Plus health board | Age-sex adjusted | Plus health board | Age-sex adjusted        | Plus health board | Age-sex adjusted         | Plus health board |
|              |                                                         | HR (95% CI)                 | HR (95% CI)       | HR (95% CI)      | HR (95% CI)       | HR (95% CI)             | HR (95% CI)       | HR (95% CI)              | HR (95% CI)       |
| Ethnic group | White Scottish                                          | 1(ref)                      | 1(ref)            | 1(ref)           | 1(ref)            | 1(ref)                  | 1(ref)            | 1(ref)                   | 1(ref)            |
|              | White Other British                                     | 0.80 (0.76-0.84)            | 0.85 (0.81-0.89)  | 0.79 (0.75-0.84) | 0.84 (0.80-0.89)  | 0.86 (0.79-0.93)        | 0.91 (0.84-0.99)  | 1.02 (0.92-1.13)         | 1.07 (0.97-1.19)  |
|              | White Irish                                             | 0.87 (0.79-0.97)            | 0.84 (0.76-0.93)  | 0.87 (0.77-0.97) | 0.83 (0.74-0.93)  | 0.86 (0.72-1.02)        | 0.82 (0.69-0.98)  | 0.86 (0.68-1.08)         | 0.83 (0.66-1.05)  |
|              | White Gypsy/Traveller                                   | 2.52 (1.79-3.54)            | 2.55 (1.81-3.58)  | 2.67 (1.88-3.80) | 2.72 (1.91-3.86)  | 2.51 (1.31-4.83)        | 2.51 (1.30-4.82)  | 1.50 (0.75-3.00)         | 1.56 (0.78-3.13)  |
|              | White Polish                                            | 0.96 (0.80-1.16)            | 1.03 (0.86-1.23)  | 0.97 (0.80-1.17) | 1.05 (0.87-1.26)  | 1.02 (0.64-1.63)        | 1.07 (0.67-1.70)  | 1.14 (0.65-2.01)         | 1.18 (0.67-2.09)  |
|              | Other White                                             | 0.86 (0.75-0.98)            | 1.03 (0.78-1.01)  | 0.84 (0.73-0.97) | 0.88 (0.77-1.02)  | 0.87 (0.69-1.12)        | 0.89 (0.70-1.13)  | 0.83 (0.61-1.14)         | 0.84 (0.61-1.15)  |
|              | Mixed or multiple ethnic groups                         | 1.01 (0.72-1.42)            | 1.03 (0.73-1.45)  | 1.02 (0.71-1.46) | 1.04 (0.73-1.49)  | 1.43 (0.77-2.65)        | 1.43 (0.77-2.66)  | 1.69 (0.81-3.56)         | 1.69 (0.81-3.55)  |
|              | Pakistani Pakistani Scottish or Pakistani British       | 1.81 (1.64-2.00)            | 1.75 (1.59-1.93)  | 1.92 (1.73-2.12) | 1.84 (1.66-2.04)  | 1.57 (1.29-1.91)        | 1.50 (1.23-1.83)  | 1.21 (0.96-1.52)         | 1.17 (0.93-1.47)  |
|              | Indian Indian Scottish or Indian British                | 0.92 (0.75-1.13)            | 0.91 (0.73-1.12)  | 0.94 (0.75-1.17) | 0.92 (0.74-1.15)  | 0.88 (0.58-1.33)        | 0.84 (0.56-1.27)  | 0.93 (0.57-1.52)         | 0.88 (0.54-1.44)  |
|              | Bangladeshi Bangladeshi Scottish or Bangladeshi British | 1.55 (0.97-2.50)            | 1.65 (1.03-2.66)  | 1.81 (1.13-2.92) | 1.99 (1.24-3.20)  | 0.66 (0.17-2.65)        | 0.66 (0.16-2.63)  | 0.64 (0.16-2.58)         | 0.65 (0.16-2.61)  |
|              | Chinese Chinese Scottish or Chinese British             | 1.28 (0.99-1.65)            | 1.27 (0.98-1.64)  | 1.17 (0.88-1.56) | 1.17 (0.88-1.55)  | <b>2.11 (1.44-3.08)</b> | 2.05 (1.40-2.98)  | 1.78 (1.12-2.82)         | 1.73 (1.09-2.74)  |
|              | Other Asian                                             | 1.37 (1.08-1.73)            | 1.41 (1.11-1.78)  | 1.39 (1.09-1.78) | 1.44 (1.13-1.84)  | 1.75 (1.08-2.81)        | 1.75 (1.09-2.82)  | 1.87 (1.11-3.17)         | 1.83 (1.08-3.10)  |
|              | African                                                 | 1.58 (1.26-1.99)            | 1.61 (1.28-2.03)  | 1.70 (1.35-2.15) | 1.74 (1.38-2.19)  | 0.71 (0.32-1.58)        | 0.70 (0.31-1.56)  | 0.62 (0.26-1.49)         | 0.60 (0.25-1.44)  |



|              |                                    |                        |                        |                        |                        |                            |                            |                      |                      |
|--------------|------------------------------------|------------------------|------------------------|------------------------|------------------------|----------------------------|----------------------------|----------------------|----------------------|
|              | Caribbean or Black                 | 1.20 (0.75-1.93)       | 1.22 (0.76-1.96)       | 1.16 (0.70-1.93)       | 1.19 (0.72-1.97)       | 1.68 (0.70-4.04)           | 1.68 (0.70-4.04)           | 1.79 (0.67-4.78)     | 1.76 (0.66-4.70)     |
|              | Arab Arab Scottish or Arab British | 1.53 (1.08-2.18)       | 1.54 (1.08-2.19)       | 1.67 (1.16-2.38)       | 1.68 (1.18-2.41)       | 0.79 (0.30-2.12)           | 0.79 (0.30-2.11)           | 0.79 (0.25-2.44)     | 0.80 (0.26-2.48)     |
|              | Other Ethnic Group                 | 1.30 (0.84-2.02)       | 1.31 (0.85-2.04)       | 0.48 (0.95-2.29)       | 1.48 (0.96-2.31)       | 0.45 (0.11-1.82)           | 0.45 (0.11-1.81)           | 0.57 (0.14-2.27)     | 0.59 (0.15-2.35)     |
| Age          | 16-20                              | Ref                    | Ref                    | Ref                    | Ref                    | Ref                        | Ref                        | Ref                  | Ref                  |
|              | 21-25                              | 1.29 (1.09-1.52)       | 1.28 (1.09-1.52)       | 1.30 (1.09-1.53)       | 1.29 (1.09-1.53)       | 1.26 (0.45-3.54)           | 1.25 (0.45-3.52)           | 1.97 (0.40-9.75)     | 1.95 (0.39-9.66)     |
|              | 26-30                              | 1.91 (1.63-2.23)       | 1.89 (1.61-2.22)       | 1.92 (1.64-2.26)       | 1.91 (1.63-2.24)       | 1.25 (0.43-3.60)           | 1.24 (0.43-3.57)           | 0.95 (0.17-5.21)     | 0.95 (0.17-5.21)     |
|              | 31-35                              | 2.60 (2.23-3.03)       | 2.58 (2.21-3.01)       | 2.59 (2.22-3.02)       | 2.57 (2.20-3.00)       | 3.95 (1.61-9.70)           | 3.91 (1.59-9.61)           | 2.60 (0.59-11.53)    | 2.57 (0.58-11.40)    |
|              | 36-40                              | 3.01 (2.59-3.50)       | 2.99 (2.57-3.47)       | 3.00 (2.58-3.50)       | 2.98 (2.56-3.47)       | 6.11 (2.57-14.49)          | 6.05 (2.55-14.37)          | 3.99 (0.94-16.90)    | 3.96 (0.94-16.77)    |
|              | 41-45                              | 3.93 (3.39-4.55)       | 3.91 (3.37-4.53)       | 3.83 (3.30-4.45)       | 3.81 (3.29-4.43)       | 12.56 (5.45-28.93)         | 12.47 (5.41-28.74)         | 6.42 (1.56-26.50)    | 6.36 (1.54-26.26)    |
|              | 46-50                              | 5.74 (4.98-6.61)       | 5.69 (4.94-6.56)       | 5.61 (4.86-6.47)       | 5.56 (4.82-6.41)       | 24.52 (10.83-55.52)        | 24.30 (10.73-55.03)        | 9.75 (2.40-39.49)    | 9.63 (2.38-39.01)    |
|              | 51-55                              | 8.81 (7.68-10.11)      | 8.71 (7.59-10.00)      | 8.61 (7.49-9.89)       | 8.49 (7.39-9.76)       | 39.02 (17.35-87.79)        | 38.58 (17.15-86.78)        | 10.08 (2.50-40.65)   | 9.88 (2.45-39.85)    |
|              | 56-60                              | 13.54 (11.82-15.51)    | 13.36 (11.66-15.30)    | 13.03 (11.36-14.95)    | 12.83 (11.19-14.72)    | 83.45 (37.27-186.85)       | 82.28 (36.75-184.23)       | 15.02 (3.74-60.32)   | 14.77 (3.68-59.32)   |
|              | 61-65                              | 22.54 (19.69-25.81)    | 22.24 (19.43-25.46)    | 21.24 (18.53-24.36)    | 20.92 (18.24-23.98)    | 187.21 (83.79-418.30)      | 184.74 (82.68-412.78)      | 21.12 (5.27-84.69)   | 20.80 (5.19-83.43)   |
|              | 66-70                              | 41.35 (36.13-47.32)    | 40.93 (35.76-46.84)    | 38.00 (33.15-43.56)    | 37.54 (32.75-43.03)    | 411.29 (184.24-918.15)     | 407.48 (182.53-909.64)     | 27.05 (6.75-108.38)  | 26.72 (6.67-107.10)  |
|              | 71-75                              | 74.02 (64.76-84.61)    | 73.32 (64.15-83.81)    | 64.60 (56.42-73.96)    | 63.89 (55.80-73.15)    | 921.45 (413.28-2054.47)    | 912.50 (409.26-2034.52)    | 35.43 (8.85-141.87)  | 35.04 (8.75-140.30)  |
|              | 76-80                              | 116.3 (102.25-133.53)  | 115.37 (100.96-131.85) | 94.61 (82.63-108.32)   | 93.23 (81.43-106.74)   | 1609.97 (722.28-3588.63)   | 1589.56 (713.12-3543.14)   | 38.00 (9.49-152.13)  | 37.53 (9.37-150.25)  |
|              | 81-85                              | 163.24 (142.88-186.50) | 161.56 (141.41-184.59) | 118.9 (103.88-136.19)  | 117.54 (102.66-134.58) | 2741.05 (1230.12-6107.84)  | 2709.22 (1215.83-6036.92)  | 46.69 (11.66-186.90) | 46.01 (11.49-184.19) |
|              | 86-90                              | 190.80 (166.86-218.17) | 190.04 (166.20-217.31) | 120.39 (104.96-138.09) | 119.85 (104.49-137.47) | 3917.25 (1757.82-8729.48)  | 3895.21 (1747.92-8680.39)  | 55.40 (13.84-221.82) | 54.85 (13.70-219.62) |
|              | >90                                | 200.35 (174.73-229.73) | 200.56 (174.91-229.97) | 95.34 (82.55-110.10)   | 95.49 (82.68-110.28)   | 5425.99 (2433.70-12097.41) | 5419.99 (2431.00-12084.05) | 69.43 (17.32-278.28) | 68.68 (17.14-275.27) |
|              | sex                                | Male                   | Ref                    | Ref                    | Ref                    | Ref                        | Ref                        | Ref                  | Ref                  |
| Female       |                                    | 0.78 (0.77-0.80)       | 0.78 (0.77-0.80)       | 0.80 (0.78-0.82)       | 0.91 (0.83-1.00)       | 0.65 (0.63-0.68)           | 0.63 (0.63-0.67)           | 0.73 (0.70-0.77)     | 0.73 (0.69-0.76)     |
| Health Board | Ayrshire and Arran                 |                        | Ref                    |                        | 0.95 (0.87-1.03)       |                            | Ref                        |                      | Ref                  |
|              | Borders                            |                        | 0.86 (0.79-0.94)       |                        | 0.89 (0.84-0.95)       |                            | 0.80 (0.69-0.93)           |                      | 0.91 (0.76-1.08)     |
|              | Dumfries and Galloway              |                        | 0.89 (0.83-0.96)       |                        | 0.65 (0.61-0.69)       |                            | 0.69 (0.60-0.79)           |                      | 0.74 (0.62-0.88)     |
|              | Forth Valley                       |                        | 0.88 (0.84-0.94)       |                        | 0.65 (0.60-0.70)       |                            | 0.89 (0.81-0.98)           |                      | 0.89 (0.79-0.99)     |
|              | Grampian                           |                        | 0.66 (0.63-0.70)       |                        | 0.76 (0.72-0.79)       |                            | 0.68 (0.62-0.75)           |                      | 0.83 (0.74-0.94)     |
|              | Highland                           |                        | 0.68 (0.64-0.73)       |                        | 0.86 (0.65-1.13)       |                            | 0.66 (0.59-0.74)           |                      | 0.67 (0.56-0.79)     |
|              | Lothian                            |                        | 0.78 (0.75-0.82)       |                        | 0.59 (0.41-0.85)       |                            | 0.84 (0.78-0.91)           |                      | 0.87 (0.79-0.95)     |
|              | Orkney                             |                        | 0.81 (0.63-1.06)       |                        | 0.74 (0.60-0.90)       |                            | 0.60 (0.35-1.02)           |                      | 0.83 (0.43-1.60)     |
|              | Shetland                           |                        | 0.69 (0.51-0.95)       |                        | 0.77 (0.72-0.82)       |                            | 1.09 (0.69-1.71)           |                      | 1.74 (0.93-3.25)     |
|              | Western Isles                      |                        | 0.69 (0.58-0.84)       |                        | 0.59 (0.78-0.88)       |                            | 0.51 (0.36-0.73)           |                      | 0.69 (0.44-1.09)     |
|              | Fife                               |                        | 0.77 (0.73-0.81)       |                        | 0.77 (0.93-1.01)       |                            | 0.74 (0.68-0.82)           |                      | 0.89 (0.78-1.00)     |
|              | Tayside                            |                        | 0.84 (0.79-0.88)       |                        | 0.83 (0.96-1.06)       |                            | 0.88 (0.80-0.96)           |                      | 0.94 (0.84-1.05)     |
|              | Greater Glasgow and Clyde          |                        | 0.95 (0.91-0.99)       |                        | 0.97 (0.83-1.00)       |                            | 0.96 (0.90-1.03)           |                      | 1.03 (0.94-1.11)     |
|              | Lanarkshire                        |                        | 0.99 (0.95-1.03)       |                        | 1.01 (0.87-1.03)       |                            | 0.99 (0.92-1.06)           |                      | 1.03 (0.94-1.12)     |

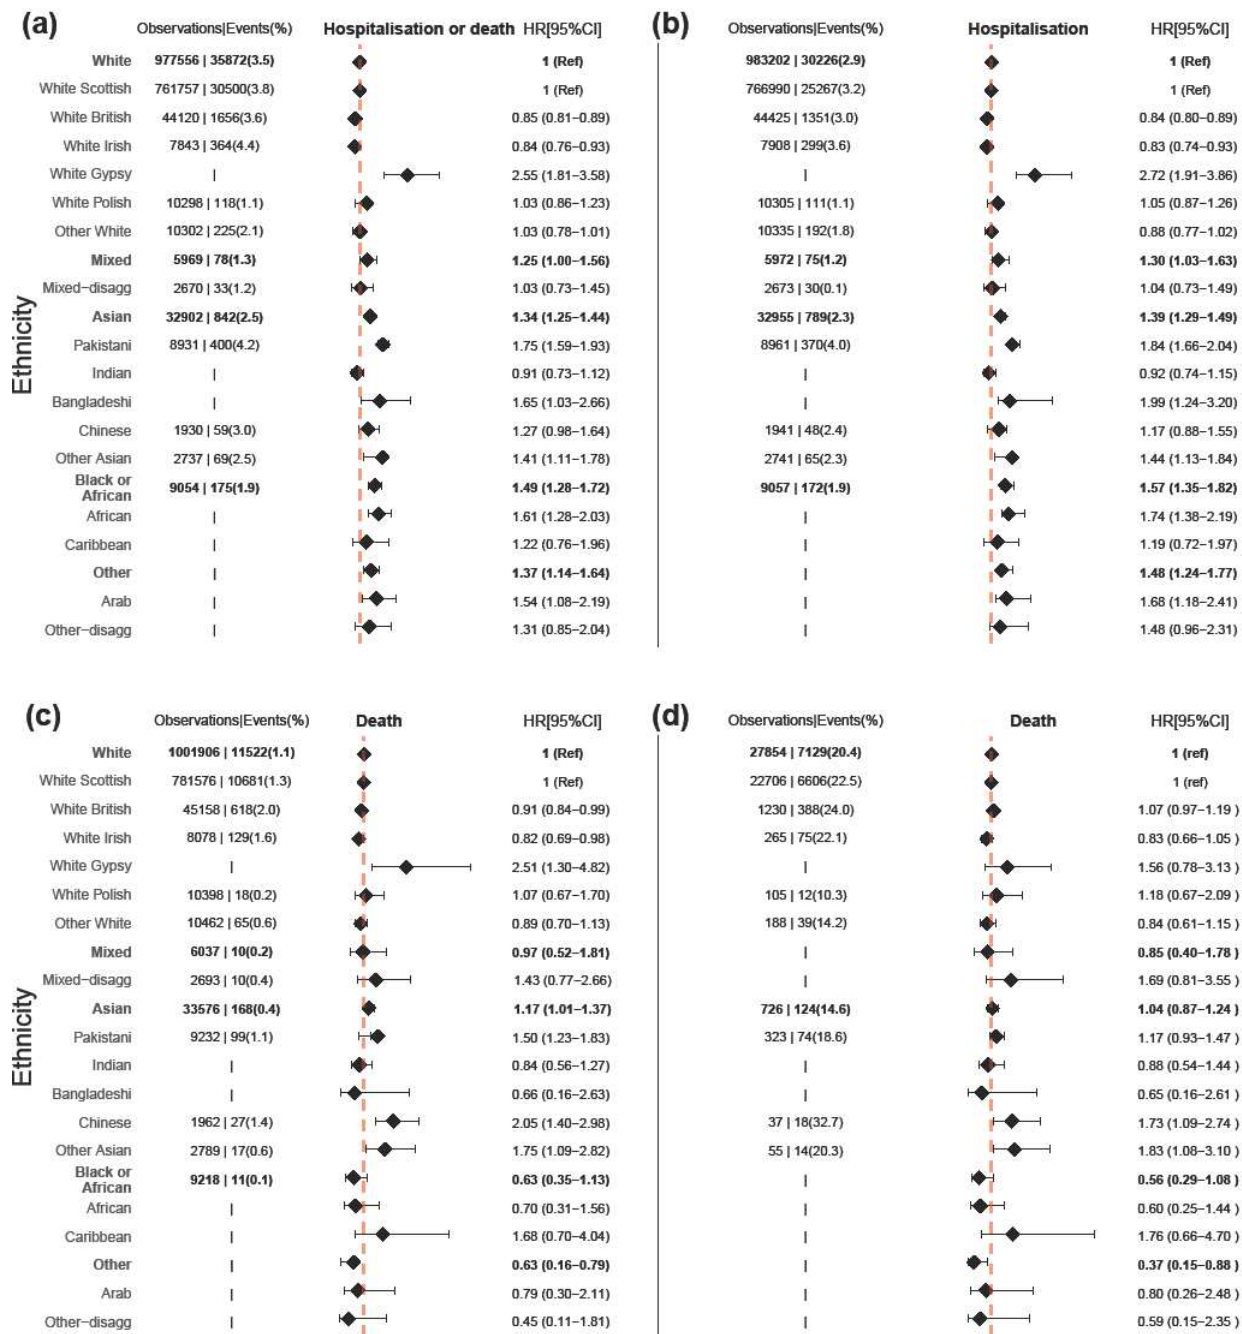

Figure S2: Ethnic differences in the risk of COVID-19 related outcomes: (a) hospitalisations or deaths following confirmed positive SARS-CoV-2 test, (b) hospitalisations following confirmed positive SARS-CoV-2 test, (c) deaths following confirmed positive SARS-CoV-2 test, and (d) deaths following COVID-19 hospitalisation

Models adjusted for age, sex and health board. Bold estimates are for aggregated ethnic groups with White group as the reference category. The non-bold estimates are for disaggregated ethnic groups with White Scottish as the reference category. Data are observations and events, HR (95%CI) = Hazard ratio (95% Confidence Interval). The bold and non-bold HR estimates are not comparable since they are based on different reference categories. Observations and Events for ethnic groups containing small numbers ( $\leq 10$ ) were removed as per data disclosure agreements and indicated by only low numbers not allowable for disclosure release are represented by |.

Table S7: Ethnic differences in the risk of COVID-19 related hospitalisations and deaths, hospitalisations and deaths based on 5 aggregated ethnic categories across waves following a confirmed positive SARS-CoV-2 test and COVID-19 hospitalisation where primary position of hospitalisation or death was only COVID-19.

| Variable     | Categories             | Confirmed positive SARS-CoV-2 test |                        |                        |                              |                              |                              | COVID-19 hospitalisation |                       |
|--------------|------------------------|------------------------------------|------------------------|------------------------|------------------------------|------------------------------|------------------------------|--------------------------|-----------------------|
|              |                        | Hospitalisations and deaths        |                        | Hospitalisations       |                              | Deaths                       |                              | Deaths                   |                       |
|              |                        | Age-sex adjusted                   | Plus health board      | Age-sex adjusted       | Plus health board            | Age-sex adjusted             | Plus health board            | Age-sex adjusted         | Plus health board     |
|              |                        | HR (95% CI)                        | HR (95% CI)            | HR (95% CI)            | HR (95% CI)                  | HR (95% CI)                  | HR (95% CI)                  | HR (95% CI)              | HR (95% CI)           |
| Ethnic group | White                  | 1(ref)                             | 1(ref)                 | 1(ref)                 | 1(ref)                       | 1(ref)                       | 1(ref)                       | 1(ref)                   | 1(ref)                |
|              | Mixed                  | 1.49 (1.13-1.95)                   | 1.51 (1.15-1.98)       | 1.56 (1.18-2.07)       | 1.60 (1.21-2.12)             | 1.20 (0.63-2.32)             | 1.20 (0.62-2.30)             | 1.20 (0.54-2.67)         | 1.20 (0.54-2.67)      |
|              | Asian                  | 1.65 (1.52-1.79)                   | 1.62 (1.49-1.75)       | 1.72 (1.58-1.88)       | 1.69 (1.55-1.84)             | 1.42 (1.21-1.67)             | 1.36 (1.15-1.60)             | 1.31 (1.07-1.61)         | 1.26 (1.03-1.55)      |
|              | Black                  | 1.72 (1.43-2.06)                   | 1.74 (1.45-2.09)       | 1.82 (1.51-2.19)       | 1.87 (1.55-2.25)             | 0.71 (0.37-1.36)             | 0.69 (0.36-1.33)             | 0.52 (0.22-1.25)         | 0.50 (0.21-1.21)      |
|              | Other                  | 1.62 (1.31-2.01)                   | 1.64 (1.32-2.03)       | 1.80 (1.45-2.23)       | 1.83 (1.47-2.27)             | 0.32 (0.12-0.86)             | 0.32 (0.12-0.85)             | 0.35 (0.11-1.09)         | 0.36 (0.12-1.11)      |
| Age          | 16-20                  | Ref                                | Ref                    | Ref                    | Ref                          | Ref                          | Ref                          | Ref                      | Ref                   |
|              | 21-25                  | 1.89 (1.46-2.44)                   | 1.88 (1.45-2.44)       | 1.89 (1.46-2.45)       | 1.89 (1.45-2.44)             | 1.65 (0.15-18.21)            | 1.65 (0.15-18.15)            | 1.02 (0.00-Inf)          | 1.00 (0.00-Inf)       |
|              | 26-30                  | 2.94 (2.30-3.75)                   | 2.93 (2.29-3.74)       | 2.93 (2.29-3.75)       | 2.92 (2.28-3.74)             | 5.96 (0.73-48.42)            | 5.92 (0.73-48.11)            | 131111.70 (0.00-Inf)     | 129991.53 (0.00-Inf)  |
|              | 31-35                  | 3.91 (3.08-4.96)                   | 3.89 (3.07-4.94)       | 3.90 (3.07-4.96)       | 3.88 (3.05-4.94)             | 11.63 (1.52-88.94)           | 11.55 (1.51-88.31)           | 279955.40 (0.00-Inf)     | 276081.17 (0.00-Inf)  |
|              | 36-40                  | 5.49 (4.36-6.93)                   | 5.47 (4.34-6.90)       | 5.46 (4.32-6.90)       | 5.44 (4.31-6.87)             | 21.03 (2.84-155.72)          | 20.90 (2.82-154.75)          | 401744.70 (0.00-Inf)     | 396478.71 (0.00-Inf)  |
|              | 41-45                  | 7.96 (6.33-10.01)                  | 7.95 (6.32-9.99)       | 7.72 (6.13-9.73)       | 7.72 (6.13-9.72)             | 54.75 (7.57-396.06)          | 54.42 (7.54-394.36)          | 761759.80 (0.00-Inf)     | 749359.01 (0.00-Inf)  |
|              | 46-50                  | 11.52 (9.20-14.43)                 | 11.44 (9.14-14.33)     | 11.24 (8.96-14.10)     | 11.15 (8.89-13.99)           | 97.21 (13.55-697.55)         | 96.54 (13.45-692.75)         | 89877.70 (0.00-Inf)      | 1071753.10 (0.00-Inf) |
|              | 51-55                  | 18.44 (14.78-23.01)                | 18.22 (14.60-22.74)    | 17.94 (14.35-22.42)    | 17.69 (14.16-22.11)          | 178.14 (24.95-1272.11)       | 176.17 (24.67-1258.10)       | 1390033.00 (0.00-Inf)    | 1355587.03 (0.00-Inf) |
|              | 56-60                  | 28.82 (23.12-35.91)                | 28.38 (22.77-35.37)    | 27.28 (21.86-34.05)    | 26.80 (21.47-33.45)          | 396.16 (55.63-2821.33)       | 390.65 (54.85-2782.10)       | 1934190.26 (0.00-Inf)    | 1887521.68 (0.00-Inf) |
|              | 61-65                  | 46.9 (37.68-58.47)                 | 46.25 (37.13-57.61)    | 43.38 (34.76-54.13)    | 42.61 (34.15-53.17)          | 898.01 (126.23-6388.33)      | 886.68 (124.64-6307.69)      | 296240.13 (0.00-Inf)     | 2897352.21 (0.00-Inf) |
|              | 66-70                  | 84.17 (67.58-104.83)               | 83.21 (66.81-103.64)   | 75.76 (60.72-94.53)    | 74.65 (59.83-93.15)          | 1922.76 (270.40-13672.35)    | 1907.84 (268.30-13566.22)    | 3656738.02 (0.00-Inf)    | 3588705.26 (0.00-Inf) |
|              | 71-75                  | 151.05 (121.42-187.92)             | 149.50 (120.17-185.98) | 127.47 (102.27-158.87) | 125.81 (100.94-156.81)       | 4489.36 (631.81-31899.46)    | 4452.61 (626.64-31638.38)    | 5154736.02 (0.00-Inf)    | 5060399.86 (0.00-Inf) |
|              | 76-80                  | 237.35 (190.82-295.24)             | 233.93 (188.07-290.99) | 183.01 (146.81-228.13) | 179.81 (144.25-224.15)       | 7824.59 (1101.34-55590.83)   | 7732.52 (1088.38-54936.77)   | 5267020.80 (0.00-Inf)    | 5162892.67 (0.00-Inf) |
|              | 81-85                  | 338.32 (272.06-420.71)             | 333.98 (268.57-415.32) | 229.68 (184.24-286.32) | 226.02 (181.31-281.77)       | 13679.89 (1925.86-97171.57)  | 13527.77 (1904.45-96091.19)  | 6389295.91 (0.00-Inf)    | 6245274.54 (0.00-Inf) |
|              | 86-90                  | 398.93 (320.57-496.44)             | 396.84 (318.89-493.84) | 224.55 (179.77-280.48) | 223.02 (178.55-278.57)       | 19889.86 (2799.99-141288.50) | 19793.57 (2786.44-140604.51) | 7333054.31 (0.00-Inf)    | 7205491.22 (0.00-Inf) |
| >90          | 440.57 (353.25-549.47) | 440.60 (353.28-549.51)             | 172.59 (137.16-217.19) | 172.51 (137.09-217.08) | 28542.57 (4017.17-202799.19) | 28552.92 (4018.62-202872.84) | 8572249.02 (0.00-Inf)        | 8397190.68 (0.00-Inf)    |                       |
| Sex          | Male                   | Ref                                | Ref                    | Ref                    | Ref                          | Ref                          | Ref                          | Ref                      | Ref                   |
|              | Female                 | 0.76 (0.74-0.78)                   | 0.76 (0.74-0.78)       | 0.78 (0.76-0.81)       | 0.78 (0.76-0.80)             | 0.62 (0.60-0.65)             | 0.62 (0.60-0.65)             | 0.7 (0.66-0.74)          | 0.69 (0.65-0.74)      |
| Health Board | Ayrshire and Arran     |                                    | Ref                    |                        | Ref                          |                              | Ref                          |                          | Ref                   |
|              | Borders                |                                    | 0.85 (0.76-0.94)       |                        | 0.91 (0.81-1.02)             |                              | 0.81 (0.68-0.96)             |                          | 1.1 (0.89-1.36)       |
|              | Dumfries and Galloway  |                                    | 0.91 (0.83-1.00)       |                        | 0.98 (0.89-1.08)             |                              | 0.67 (0.57-0.79)             |                          | 0.80 (0.64-1.00)      |
|              | Forth Valley           |                                    | 0.99 (0.93-1.06)       |                        | 1.02 (0.94-1.09)             |                              | 0.90 (0.80-1.00)             |                          | 0.95 (0.82-1.10)      |
|              | Grampian               |                                    | 0.73 (0.69-0.78)       |                        | 0.73 (0.67-0.78)             |                              | 0.71 (0.64-0.79)             |                          | 0.86 (0.74-1.01)      |
|              | Highland               |                                    | 0.66 (0.61-0.72)       |                        | 0.63 (0.57-0.69)             |                              | 0.65 (0.56-0.74)             |                          | 0.69 (0.56-0.86)      |

|  |                           |  |                  |  |                  |  |                  |  |                  |
|--|---------------------------|--|------------------|--|------------------|--|------------------|--|------------------|
|  | Lothian                   |  | 0.74 (0.70-0.79) |  | 0.68 (0.64-0.72) |  | 0.86 (0.78-0.93) |  | 0.84 (0.74-0.95) |
|  | Orkney                    |  | 0.65 (0.45-0.93) |  | 0.75 (0.52-1.09) |  | 0.35 (0.16-0.79) |  | 0.64 (0.24-1.71) |
|  | Shetland                  |  | 0.76 (0.53-1.10) |  | 0.57 (0.36-0.91) |  | 1.17 (0.70-1.95) |  | 1.40 (0.58-3.38) |
|  | Western Isles             |  | 0.60 (0.47-0.77) |  | 0.67 (0.51-0.87) |  | 0.39 (0.24-0.62) |  | 0.58 (0.31-1.09) |
|  | Fife                      |  | 0.74 (0.69-0.79) |  | 0.71 (0.66-0.77) |  | 0.75 (0.67-0.84) |  | 0.87 (0.75-1.02) |
|  | Tayside                   |  | 0.92 (0.87-0.98) |  | 0.93 (0.86-0.99) |  | 0.91 (0.82-1.00) |  | 1.00 (0.87-1.15) |
|  | Greater Glasgow and Clyde |  | 0.98 (0.93-1.03) |  | 0.98 (0.93-1.04) |  | 0.98 (0.91-1.06) |  | 1.05 (0.94-1.16) |
|  | Lanarkshire               |  | 0.99 (0.94-1.04) |  | 0.99 (0.93-1.05) |  | 1.00 (0.92-1.09) |  | 1.02 (0.91-1.15) |

Table S8: Ethnic differences in the risk of COVID-19 related hospitalisations and deaths, hospitalisations and deaths based on 16 disaggregated ethnic subcategories across waves following a confirmed positive SARS-CoV-2 test and COVID-19 hospitalisation where primary position of hospitalisation or death was only COVID-19.

| Variable           | Categories            | Confirmed positive SARS-CoV-2 test |                     |                     |                     |                        |                        | COVID-19 hospitalisation |                    |
|--------------------|-----------------------|------------------------------------|---------------------|---------------------|---------------------|------------------------|------------------------|--------------------------|--------------------|
|                    |                       | Hospitalisations and deaths        |                     | Hospitalisations    |                     | Deaths                 |                        | Deaths                   |                    |
|                    |                       | Age-sex adjusted                   | Plus health board   | Age-sex adjusted    | Plus health board   | Age-sex adjusted       | Plus health board      | Age-sex adjusted         | Plus health board  |
|                    |                       | HR (95% CI)                        | HR (95% CI)         | HR (95% CI)         | HR (95% CI)         | HR (95% CI)            | HR (95% CI)            | HR (95% CI)              | HR (95% CI)        |
| Ethnic group       | White Scottish        | 1(ref)                             | 1(ref)              | 1(ref)              | 1(ref)              | 1(ref)                 | 1(ref)                 | 1(ref)                   | 1(ref)             |
|                    | White Other British   | 0.79 (0.74-0.84)                   | 0.83 (0.78-0.88)    | 0.77 (0.71-0.82)    | 0.81 (0.75-0.87)    | 0.85 (0.77-0.93)       | 0.91 (0.82-1.00)       | 0.97 (0.85-1.11)         | 1.02 (0.89-1.16)   |
|                    | White Irish           | 0.86 (0.76-0.98)                   | 0.83 (0.73-0.94)    | 0.85 (0.73-0.98)    | 0.82 (0.71-0.95)    | 0.81 (0.66-1.00)       | 0.77 (0.63-0.95)       | 0.77 (0.56-1.04)         | 0.74 (0.55-1.01)   |
|                    | White Gypsy/Traveller | 2.47 (1.59-3.83)                   | 2.46 (1.59-3.82)    | 2.90 (1.87-4.50)    | 2.90 (1.87-4.49)    | 1.87 (0.78-4.48)       | 1.85 (0.77-4.45)       | 1.47 (0.61-3.55)         | 1.50 (0.62-3.60)   |
|                    | White Polish          | 1.02 (0.81-1.29)                   | 1.09 (0.86-1.37)    | 1.03 (0.81-1.32)    | 1.11 (0.87-1.42)    | 1.01 (0.58-1.74)       | 1.05 (0.61-1.81)       | 1.20 (0.60-2.41)         | 1.25 (0.62-2.51)   |
|                    | Other White           | 0.94 (0.80-1.10)                   | 0.97 (0.83-1.14)    | 0.95 (0.80-1.13)    | 1.00 (0.84-1.19)    | 0.83 (0.62-1.10)       | 0.84 (0.63-1.12)       | 0.80 (0.53-1.20)         | 0.80 (0.53-1.21)   |
|                    | Mixed - disaggregate  | 1.17 (0.77-1.78)                   | 1.20 (0.79-1.82)    | 1.17 (0.75-1.84)    | 1.21 (0.77-1.90)    | 1.73 (0.90-3.32)       | 1.74 (0.90-3.34)       | 2.36 (1.06-5.26)         | 2.39 (1.07-5.32)   |
|                    | Pakistani             | 2.15 (1.92-2.42)                   | 2.08 (1.85-2.33)    | 2.28 (2.01-2.57)    | 2.20 (1.94-2.49)    | 1.77 (1.43-2.20)       | 1.69 (1.36-2.09)       | 1.40 (1.07-1.83)         | 1.34 (1.02-1.76)   |
|                    | Indian                | 0.97 (0.75-1.26)                   | 0.95 (0.74-1.24)    | 1.04 (0.79-1.36)    | 1.02 (0.78-1.34)    | 0.91 (0.58-1.45)       | 0.87 (0.55-1.38)       | 1.20 (0.70-2.08)         | 1.13 (0.66-1.95)   |
|                    | Bangladeshi           | 2.09 (1.24-3.54)                   | 2.21 (1.31-3.73)    | 2.57 (1.52-4.34)    | 2.82 (1.67-4.77)    | 0.87 (0.22-3.49)       | 0.86 (0.22-3.46)       | 1.04 (0.26-4.15)         | 1.07 (0.27-4.30)   |
|                    | Chinese               | 1.61 (1.21-2.15)                   | 1.59 (1.19-2.13)    | 1.41 (1.01-1.98)    | 1.41 (1.00-1.97)    | 2.82 (1.93-4.11)       | 2.72 (1.86-3.97)       | 2.36 (1.42-3.93)         | 2.26 (1.36-3.76)   |
|                    | Other Asian           | 1.72 (1.31-2.25)                   | 1.75 (1.34-2.30)    | 1.76 (1.33-2.34)    | 1.82 (1.37-2.42)    | 2.09 (1.26-3.47)       | 2.08 (1.25-3.45)       | 2.29 (1.27-4.14)         | 2.23 (1.23-4.03)   |
|                    | African               | 1.84 (1.39-2.43)                   | 1.87 (1.41-2.47)    | 1.94 (1.46-2.59)    | 1.99 (1.49-2.65)    | 0.96 (0.43-2.14)       | 0.94 (0.42-2.10)       | 0.59 (0.19-1.83)         | 0.57 (0.18-1.76)   |
|                    | Caribbean             | 1.28 (0.71-2.31)                   | 1.30 (0.72-2.34)    | 1.33 (0.72-2.48)    | 1.37 (0.73-2.54)    | 1.35 (0.44-4.19)       | 1.35 (0.43-4.18)       | 1.48 (0.37-5.91)         | 1.47 (0.37-5.90)   |
| Arab               | 1.86 (1.24-2.81)      | 1.88 (1.25-2.83)                   | 2.09 (1.37-3.17)    | 2.12 (1.40-3.23)    | 1.06 (0.40-2.84)    | 1.06 (0.40-2.81)       | 1.25 (0.40-3.87)       | 1.28 (0.41-3.97)         |                    |
| Other Ethnic Group | 1.27 (0.72-2.24)      | 1.29 (0.73-2.26)                   | 1.50 (0.85-2.65)    | 1.53 (0.87-2.70)    | 0.00 (0-Inf)        | 0.00 (0.00-Inf)        | 0.00 (0.00-Inf)        | 0.00 (0.00-Inf)          |                    |
| Age                | 16-20                 | Ref                                | Ref                 | Ref                 | Ref                 | Ref                    | Ref                    | Ref                      | Ref                |
|                    | 21-25                 | 1.94 (1.45-2.60)                   | 1.94 (1.45-2.59)    | 1.95 (1.45-2.61)    | 1.94 (1.45-2.60)    | 1.68 (0.15-18.53)      | 1.67 (0.15-18.45)      | 1.02 (0.00-Inf)          | 1.01 (0.00-Inf)    |
|                    | 26-30                 | 3.17 (2.40-4.18)                   | 3.14 (2.38-4.15)    | 3.16 (2.39-4.18)    | 3.14 (2.37-4.14)    | 6.57 (0.81-53.42)      | 6.51 (0.80-52.94)      | 149994.00 (0-Inf)        | 149437.05 (0-Inf)  |
|                    | 31-35                 | 4.24 (3.24-5.57)                   | 4.21 (3.21-5.52)    | 4.23 (3.22-5.56)    | 4.19 (3.19-5.51)    | 13.45 (1.76-102.81)    | 13.32 (1.74-101.81)    | 337805.97 (0-Inf)        | 334035.76 (0-Inf)  |
|                    | 36-40                 | 5.55 (4.26-7.23)                   | 5.51 (4.23-7.18)    | 5.50 (4.21-7.18)    | 5.46 (4.18-7.12)    | 23.49 (3.17-173.94)    | 23.28 (3.14-172.41)    | 488115.12 (0-Inf)        | 482732.32 (0-Inf)  |
|                    | 41-45                 | 7.79 (6.01-10.11)                  | 7.76 (5.99-10.06)   | 7.47 (5.74-9.71)    | 7.44 (5.72-9.67)    | 57.74 (7.98-417.64)    | 57.34 (7.93-414.81)    | 913433.84 (0-Inf)        | 905207.82 (0-Inf)  |
|                    | 46-50                 | 11.66 (9.04-15.03)                 | 11.57 (8.98-14.92)  | 11.29 (8.74-14.59)  | 11.20 (8.67-14.47)  | 97.27 (13.56-698.02)   | 96.44 (13.44-692.02)   | 1191579.79 (0-Inf)       | 1173884.49 (0-Inf) |
|                    | 51-55                 | 19.32 (15.05-24.80)                | 19.11 (14.89-24.53) | 18.70 (14.53-24.05) | 18.47 (14.36-23.76) | 173.58 (24.31-1239.58) | 171.56 (24.02-1225.13) | 1446356.85 (0-Inf)       | 1416177.14 (0-Inf) |
|                    | 56-60                 | 30.32 (23.66-38.85)                | 29.91 (23.34-38.33) | 28.46 (22.16-36.56) | 28.03 (21.82-36.00) | 379.49 (53.29-2702.58) | 373.93 (52.51-2663.00) | 1952828.53 (0-Inf)       | 1911372.96 (0-Inf) |
|                    | 61-65                 | 50.00 (39.03-)                     | 49.34 (38.52-63.20) | 45.77 (35.65-)      | 45.07 (35.11-57.87) | 850.49 (119.56-)       | 838.87 (117.92-)       | 2896130.02 (0-Inf)       | 2842894.51 (0-Inf) |

|              |                           |                        |                        |                        |                        |                              |                              |                    |                    |  |  |
|--------------|---------------------------|------------------------|------------------------|------------------------|------------------------|------------------------------|------------------------------|--------------------|--------------------|--|--|
|              |                           | 64.04)                 |                        | 58.76)                 |                        | 6050.25)                     |                              | 5967.55)           |                    |  |  |
|              | 66-70                     | 90.66 (70.80-116.10)   | 89.74 (70.08-114.91)   | 80.91 (63.04-103.86)   | 79.88 (62.23-102.54)   | 1789.59 (251.67-12725.36)    | 1773.10 (249.35-12608.06)    | 3486546.42 (0-Inf) | 3431533.76 (0-Inf) |  |  |
|              | 71-75                     | 166.54 (130.21-213.00) | 164.97 (128.98-211.00) | 139.18 (108.55-178.45) | 137.61 (107.33-176.44) | 4167.17 (586.47-29610.06)    | 4126.83 (580.79-29323.46)    | 4816542.84 (0-Inf) | 4743631.69 (0-Inf) |  |  |
|              | 76-80                     | 261.86 (204.77-334.86) | 258.60 (202.22-330.70) | 199.57 (155.64-255.90) | 196.65 (153.36-252.15) | 7159.46 (1007.72-50865.14)   | 7069.11 (995.00-50223.30)    | 4831697.17 (0-Inf) | 4751577.27 (0-Inf) |  |  |
|              | 81-85                     | 375.26 (293.53-479.76) | 371.30 (290.43-474.69) | 250.90 (195.67-321.72) | 247.71 (193.18-317.64) | 12480.49 (1757.02-88651.68)  | 12334.43 (1736.45-87614.38)  | 5834200.21 (0-Inf) | 5721524.85 (0-Inf) |  |  |
|              | 86-90                     | 441.76 (345.32-565.13) | 439.84 (343.82-562.68) | 244.12 (190.04-313.59) | 242.87 (189.07-311.99) | 18012.69 (2535.74-127953.43) | 17900.17 (2519.90-127154.31) | 6656290.85 (0-Inf) | 6560586.26 (0-Inf) |  |  |
|              | >90                       | 492.20 (383.99-630.89) | 492.32 (384.09-631.05) | 188.55 (145.78-243.86) | 188.65 (145.86-243.99) | 25829.00 (3635.26-183518.27) | 25785.69 (3629.16-183210.90) | 7658489.57 (0-Inf) | 7534040.23 (0-Inf) |  |  |
| sex          | Male                      | Ref                    | Ref                    | Ref                    | Ref                    | Ref                          | Ref                          | Ref                | Ref                |  |  |
|              | Female                    | 0.76 (0.74-0.78)       | 0.76 (0.74-0.78)       | 0.78 (0.76-0.81)       | 0.78 (0.76-0.80)       | 0.63 (0.60-0.65)             | 0.62 (0.60-0.65)             | 0.69 (0.65-0.74)   | 0.60 (0.65-0.73)   |  |  |
| Health Board | Ayrshire and Arran        |                        | Ref                    |                        | Ref                    |                              | Ref                          |                    | Ref                |  |  |
|              | Borders                   |                        | 0.87 (0.78-0.97)       |                        | 0.95 (0.84-1.08)       |                              | 0.80 (0.67-0.95)             |                    | 1.05 (0.85-1.30)   |  |  |
|              | Dumfries and Galloway     |                        | 0.93 (0.85-1.02)       |                        | 1.01 (0.91-1.12)       |                              | 0.69 (0.59-0.81)             |                    | 0.81 (0.65-1.01)   |  |  |
|              | Forth Valley              |                        | 0.99 (0.93-1.06)       |                        | 1.03 (0.95-1.11)       |                              | 0.88 (0.79-0.99)             |                    | 0.94 (0.81-1.09)   |  |  |
|              | Grampian                  |                        | 0.73 (0.69-0.78)       |                        | 0.73 (0.67-0.79)       |                              | 0.70 (0.63-0.78)             |                    | 0.86 (0.74-1.01)   |  |  |
|              | Highland                  |                        | 0.67 (0.62-0.73)       |                        | 0.63 (0.57-0.70)       |                              | 0.66 (0.58-0.75)             |                    | 0.71 (0.57-0.88)   |  |  |
|              | Lothian                   |                        | 0.77 (0.72-0.81)       |                        | 0.70 (0.65-0.75)       |                              | 0.86 (0.79-0.94)             |                    | 0.84 (0.74-0.95)   |  |  |
|              | Orkney                    |                        | 0.65 (0.45-0.95)       |                        | 0.76 (0.52-1.13)       |                              | 0.35 (0.16-0.78)             |                    | 0.60 (0.22-1.60)   |  |  |
|              | Shetland                  |                        | 0.79 (0.55-1.15)       |                        | 0.60 (0.37-0.96)       |                              | 1.15 (0.69-1.92)             |                    | 1.40 (0.58-3.38)   |  |  |
|              | Western Isles             |                        | 0.57 (0.44-0.74)       |                        | 0.63 (0.47-0.84)       |                              | 0.40 (0.25-0.64)             |                    | 0.61 (0.33-1.15)   |  |  |
|              | Fife                      |                        | 0.74 (0.69-0.80)       |                        | 0.71 (0.66-0.77)       |                              | 0.75 (0.67-0.84)             |                    | 0.87 (0.74-1.01)   |  |  |
|              | Tayside                   |                        | 0.93 (0.87-0.99)       |                        | 0.93 (0.87-1.01)       |                              | 0.90 (0.82-1.00)             |                    | 1.00 (0.87-1.15)   |  |  |
|              | Greater Glasgow and Clyde |                        | 0.98 (0.93-1.03)       |                        | 0.98 (0.93-1.04)       |                              | 0.99 (0.92-1.07)             |                    | 1.07 (0.96-1.19)   |  |  |
|              | Lanarkshire               |                        | 0.99 (0.93-1.04)       |                        | 0.99 (0.93-1.05)       |                              | 0.99 (0.91-1.08)             |                    | 1.02 (0.91-1.15)   |  |  |

Table S9: Ethnic differences in the risk of COVID-19 related hospitalisations and deaths, hospitalisations, deaths and positive SARS-CoV-2 tests based on aggregated 5 ethnic categories by waves.

| Ethnic group                             | Age-sex adjusted | Plus health board | Age-sex adjusted | Plus health board | Age-sex adjusted | Plus health board | Age-sex adjusted | Plus health board |
|------------------------------------------|------------------|-------------------|------------------|-------------------|------------------|-------------------|------------------|-------------------|
|                                          | HR (95% CI)      | HR (95% CI)       | HR (95% CI)      | HR (95% CI)       | HR (95% CI)      | HR (95% CI)       | HR (95% CI)      | HR (95% CI)       |
| <b>COVID-19 hospitalisation or death</b> |                  |                   |                  |                   |                  |                   |                  |                   |
|                                          | <b>Wave 1</b>    |                   | <b>Wave 2</b>    |                   | <b>Wave 3</b>    |                   | <b>Wave 4</b>    |                   |
| White                                    | 1 (ref)          | 1 (ref)           | 1 (ref)          | 1 (ref)           | 1(ref)           | 1(ref)            | 1(ref)           | 1(ref)            |
| Mixed or multiple ethnic groups          | 1.47 (0.83-2.59) | 1.40 (0.79-2.47)  | 0.99 (0.66-1.50) | 0.99 (0.66-1.49)  | 1.62 (1.19-2.21) | 1.63 (1.19-2.22)  | 0.57 (0.34-0.94) | 0.57 (0.34-0.95)  |
| Asian                                    | 1.35 (1.12-1.64) | 1.14 (0.94-1.38)  | 1.82 (1.64-2.02) | 1.63 (1.47-1.81)  | 1.40 (1.24-1.58) | 1.34 (1.18-1.51)  | 0.86 (0.74-1.00) | 0.83 (0.71-0.96)  |

|                                 |                  |                  |                  |                  |                  |                  |                  |                  |
|---------------------------------|------------------|------------------|------------------|------------------|------------------|------------------|------------------|------------------|
| Black                           | 1.58 (1.03-2.42) | 1.44 (0.93-2.21) | 1.77 (1.40-2.25) | 1.75 (1.38-2.21) | 1.62 (1.27-2.06) | 1.63 (1.28-2.07) | 0.68 (0.47-0.98) | 0.69 (0.48-0.99) |
| Other ethnic group              | 0.56 (0.25-1.24) | 0.52 (0.23-1.16) | 1.31 (0.96-1.79) | 1.31 (0.96-1.78) | 1.67 (1.27-2.19) | 1.67 (1.27-2.20) | 1.06 (0.76-1.48) | 1.07 (0.77-1.49) |
| <b>COVID-19 hospitalisation</b> |                  |                  |                  |                  |                  |                  |                  |                  |
|                                 | Wave 1           |                  | Wave 2           |                  | Wave 3           |                  | Wave 4           |                  |
| White                           | 1(ref)           | 1(ref)           | 1(ref)           | 1(ref)           | 1(ref)           | 1(ref)           | 1(ref)           | 1(ref)           |
| Mixed or multiple ethnic groups | 1.55 (0.83-2.88) | 1.49 (0.80-2.78) | 1.07 (0.71-1.62) | 0.86 (0.80-0.91) | 1.64 (1.20-2.25) | 1.64 (1.20-2.25) | 0.55 (0.33-0.93) | 0.55 (0.33-0.93) |
| Asian                           | 1.51 (1.22-1.86) | 1.30 (1.05-1.61) | 1.88 (1.69-2.10) | 1.43 (1.40-1.46) | 1.39 (1.23-1.58) | 1.33 (1.17-1.51) | 0.87 (0.75-1.02) | 0.83 (0.72-0.97) |
| Black                           | 1.91 (1.24-2.94) | 1.78 (1.16-2.74) | 1.87 (1.47-2.37) | 1.27 (1.21-1.33) | 1.65 (1.29-2.11) | 1.66 (1.30-2.12) | 0.68 (0.47-0.99) | 0.68 (0.47-0.99) |
| Other ethnic group              | 0.70 (0.31-1.55) | 0.66 (0.30-1.48) | 1.42 (1.04-1.93) | 1.21 (1.15-1.28) | 1.70 (1.29-2.24) | 1.70 (1.29-2.25) | 1.01 (0.71-1.43) | 1.02 (0.72-1.44) |
| <b>COVID-19 death</b>           |                  |                  |                  |                  |                  |                  |                  |                  |
|                                 | Wave 1           |                  | Wave 2           |                  | Wave 3           |                  | Wave 4           |                  |
| White                           | 1(ref)           | 1(ref)           | 1(ref)           | 1(ref)           | 1(ref)           | 1(ref)           | 1(ref)           | 1(ref)           |
| Mixed or multiple ethnic groups | 1.75 (0.73-4.20) | 1.66 (0.69-3.99) | 0.64 (0.20-1.97) | 0.63 (0.20-1.96) | 0.81 (0.20-3.26) | 0.82 (0.20-3.28) | 0.47 (0.07-3.30) | 0.47 (0.07-3.34) |
| Asian                           | 1.34 (1.00-1.79) | 1.08 (0.81-1.45) | 1.51 (1.21-1.88) | 1.31 (1.05-1.63) | 1.59 (1.16-2.18) | 1.51 (1.10-2.07) | 0.83 (0.53-1.29) | 0.79 (0.51-1.23) |
| Black                           | 0.00 (0.00-Inf)  | 0.00 (0.00-Inf)  | 1.00 (0.47-2.10) | 0.96 (0.46-2.02) | 0.50 (0.13-2.01) | 0.50 (0.13-2.02) | 0.62 (0.16-2.49) | 0.63 (0.16-2.54) |
| Other ethnic group              | 0.00 (0.00-Inf)  | 0.00 (0.00-Inf)  | 0.32 (0.08-1.27) | 0.31 (0.08-1.24) | 0.59 (0.15-2.37) | 0.59 (0.15-2.38) | 1.41 (0.53-3.76) | 1.42 (0.53-3.80) |
| <b>Positive SARS-CoV-2 test</b> |                  |                  |                  |                  |                  |                  |                  |                  |
|                                 | Wave 1           |                  | Wave 2           |                  | Wave 3           |                  | Wave 4           |                  |
| White                           | 1(ref)           | 1(ref)           | 1(ref)           | 1(ref)           | 1(ref)           | 1(ref)           | 1(ref)           | 1(ref)           |
| Mixed or multiple ethnic groups | 0.89 (0.68-1.16) | 0.86 (0.66-1.12) | 0.87 (0.81-0.92) | 0.86 (0.80-0.91) | 0.80 (0.77-0.83) | 0.79 (0.75-0.82) | 0.80 (0.78-0.83) | 0.80 (0.77-0.83) |
| Asian                           | 1.77 (1.65-1.91) | 1.64 (1.52-1.77) | 1.53 (1.50-1.56) | 1.43 (1.40-1.46) | 0.69 (0.68-0.71) | 0.67 (0.66-0.68) | 0.64 (0.63-0.65) | 0.63 (0.62-0.64) |
| Black                           | 2.10 (1.82-2.41) | 2.00 (1.74-2.30) | 1.31 (1.25-1.37) | 1.27 (1.21-1.33) | 0.87 (0.84-0.90) | 0.86 (0.83-0.89) | 0.80 (0.78-0.83) | 0.80 (0.77-0.82) |
| Other ethnic group              | 1.11 (0.89-1.39) | 1.06 (0.85-1.33) | 1.23 (1.17-1.30) | 1.21 (1.15-1.28) | 0.79 (0.76-0.82) | 0.78 (0.75-0.81) | 0.62 (0.60-0.65) | 0.62 (0.60-0.65) |

HR (95%CI) = Hazard ratio (95% Confidence Interval)- wave 1: March 1, 2020 to July 31, 2020- wave 2: August 1, 2020 to April 30, 2021- wave 3: May 1, 2021 to December 17, 2021- wave 4 : December 18, 2021 to April 17, 2022

Table S10: Ethnic differences in the risk of COVID-19 related hospitalisations and deaths, hospitalisations, deaths and positive SARS-CoV-2 tests based on disaggregated ethnic subcategories by waves.

| Ethnic group                             | Age-sex adjusted | Plus health board | Age-sex adjusted | Plus health board | Age-sex adjusted | Plus health board | Age-sex adjusted | Plus health board |
|------------------------------------------|------------------|-------------------|------------------|-------------------|------------------|-------------------|------------------|-------------------|
|                                          | HR (95% CI)      | HR (95% CI)       | HR (95% CI)      | HR (95% CI)       | HR (95% CI)      | HR (95% CI)       | HR (95% CI)      | HR (95% CI)       |
| <b>COVID-19 hospitalisation or death</b> |                  |                   |                  |                   |                  |                   |                  |                   |
|                                          | <b>Wave 1</b>    |                   | <b>Wave 2</b>    |                   | <b>Wave 3</b>    |                   | <b>Wave 4</b>    |                   |
| White Scottish                           | 1(ref)           | 1(ref)            | 1(ref)           | 1(ref)            | 1(ref)           | 1(ref)            | 1(ref)           | 1(ref)            |
| White Other British                      | 0.60 (0.53-0.67) | 0.73 (0.65-0.81)  | 0.51 (0.47-0.55) | 0.65 (0.59-0.70)  | 0.55 (0.50-0.61) | 0.61 (0.55-0.67)  | 0.69 (0.64-0.74) | 0.73 (0.68-0.80)  |
| White Irish                              | 1.13 (0.92-1.38) | 0.98 (0.79-1.20)  | 0.97 (0.83-1.13) | 0.85 (0.73-1.00)  | 0.82 (0.66-1.01) | 0.78 (0.63-0.97)  | 0.83 (0.70-1.00) | 0.77 (0.63-0.93)  |
| White Gypsy/Traveller                    | 0.82 (0.20-3.27) | 0.88 (0.22-3.53)  | 1.73 (0.93-3.22) | 1.91 (1.03-3.55)  | 1.78 (0.89-3.55) | 1.85 (0.92-3.70)  | 3.23 (2.03-5.12) | .82 (2.41-6.07)   |
| White Polish                             | 0.52 (0.26-1.03) | 0.54 (0.27-1.07)  | 0.66 (0.46-0.95) | 0.75 (0.52-1.09)  | 1.23 (0.94-1.61) | 1.33 (1.02-1.74)  | 0.82 (0.60-1.11) | 0.87 (0.62-1.20)  |
| Other White                              | 0.71 (0.52-0.96) | 0.73 (0.54-0.99)  | 0.66 (0.54-0.82) | 0.74 (0.60-0.91)  | 0.66 (0.52-0.84) | 0.70 (0.55-0.89)  | 0.61 (0.48-0.76) | 0.63 (0.50-0.80)  |
| Mixed or multiple ethnic groups          | 1.32 (0.63-2.77) | 1.34 (0.64-2.81)  | 0.66 (0.34-1.26) | 0.70 (0.37-1.35)  | 1.19 (0.72-1.97) | 1.23 (0.74-2.05)  | 0.33 (0.14-0.78) | 0.30 (0.11-0.81)  |
| Pakistani                                | 1.87 (1.40-2.50) | 1.49 (1.12-2.00)  | 3.03 (2.62-3.52) | 2.57 (2.22-2.99)  | 2.92 (2.47-3.45) | 2.72 (2.30-3.22)  | 1.43 (1.15-1.77) | 1.30 (1.04-1.64)  |
| Indian                                   | 1.05 (0.64-1.72) | 0.89 (0.54-1.45)  | 1.07 (0.77-1.47) | 0.96 (0.70-1.32)  | 0.77 (0.51-1.17) | 0.74 (0.49-1.13)  | 0.70 (0.47-1.04) | 0.67 (0.44-1.02)  |
| Bangladeshi                              | 0.65 (0.09-4.65) | 0.66 (0.09-4.71)  | 2.73 (1.47-5.07) | 3.19 (1.72-5.93)  | 1.59 (0.66-3.81) | 1.75 (0.73-4.20)  | 0.78 (0.25-2.43) | 0.97 (0.31-3.00)  |
| Chinese                                  | 0.62 (0.32-1.20) | 0.56 (0.29-1.08)  | 0.72 (0.48-1.07) | 0.69 (0.46-1.03)  | 0.61 (0.37-1.00) | 0.61 (0.37-0.99)  | 0.66 (0.44-1.01) | 0.64 (0.41-1.01)  |
| Other Asian                              | 3.24 (2.15-4.89) | 3.12 (2.07-4.71)  | 1.29 (0.87-1.93) | 1.35 (0.90-2.02)  | 0.67 (0.37-1.22) | 0.70 (0.39-1.26)  | 0.98 (0.63-1.54) | 0.96 (0.59-1.57)  |
| African                                  | 2.00 (1.13-3.53) | 1.82 (1.03-3.21)  | 1.67 (1.15-2.43) | 1.67 (1.15-2.42)  | 1.92 (1.35-2.73) | 1.96 (1.37-2.79)  | 0.38 (0.18-0.80) | 0.43 (0.21-0.91)  |
| Caribbean or Black                       | 0.74 (0.18-2.95) | 0.74 (0.18-2.95)  | 1.24 (0.62-2.47) | 1.32 (0.66-2.63)  | 0.97 (0.40-2.33) | 1.00 (0.42-2.41)  | 0.47 (0.15-1.46) | 0.55 (0.18-1.71)  |
| Arab                                     | 0.33 (0.05-2.31) | 0.30 (0.04-2.16)  | 1.66 (0.97-2.87) | 1.65 (0.96-2.84)  | 1.80 (1.02-3.17) | 1.80 (1.02-3.18)  | 1.12 (0.58-2.16) | 1.13 (0.57-2.26)  |
| Other Ethnic Group                       | 0.39 (0.05-2.75) | 0.36 (0.05-2.57)  | 1.25 (0.63-2.51) | 1.26 (0.63-2.51)  | 1.94 (1.05-3.62) | 1.97 (1.06-3.66)  | 0.48 (0.15-1.48) | 0.54 (0.18-1.69)  |

| COVID-19 hospitalisation        |                  |                  |                  |                  |                   |                   |                   |                   |
|---------------------------------|------------------|------------------|------------------|------------------|-------------------|-------------------|-------------------|-------------------|
|                                 | Wave 1           |                  | Wave 2           |                  | Wave 3            |                   | Wave 4            |                   |
|                                 | 1(ref)           | 1(ref)           | 1(ref)           | 1(ref)           | 1(ref)            | 1(ref)            | 1(ref)            | 1(ref)            |
| White Scottish                  |                  |                  |                  |                  |                   |                   |                   |                   |
| White Other British             | 0.59 (0.51-0.68) | 0.72 (0.62-0.82) | 0.51 (0.46-0.55) | 0.65 (0.59-0.71) | 0.54 (0.49-0.60)  | 0.61 (0.55-0.67)  | 0.67 (0.62-0.73)  | 0.75 (0.69-0.82)  |
| White Irish                     | 1.12 (0.86-1.46) | 0.98 (0.75-1.28) | 0.98 (0.83-1.17) | 0.86 (0.73-1.03) | 0.81 (0.64-1.01)  | 0.77 (0.62-0.97)  | 0.81 (0.66-1.00)  | 0.76 (0.62-0.94)  |
| White Gypsy/Traveller           | 1.13 (0.28-4.51) | 1.25 (0.31-5.00) | 1.95 (1.05-3.63) | 2.17 (1.17-4.03) | 1.88 (0.94-3.76)  | 1.96 (0.98-3.91)  | 3.71 (2.30-5.97)  | 3.92 (2.44-6.31)  |
| White Polish                    | 0.58 (0.28-1.23) | 0.62 (0.30-1.31) | 0.72 (0.50-1.04) | 0.84 (0.58-1.21) | 1.10 (0.82-1.47)  | 1.19 (0.89-1.58)  | 0.85 (0.61-1.17)  | 0.91 (0.66-1.27)  |
| Other White                     | 0.74 (0.51-1.06) | 0.78 (0.54-1.13) | 1.95 (0.55-0.86) | 0.78 (0.62-0.97) | 0.63 (0.49-0.81)  | 0.67 (0.52-0.86)  | 0.59 (0.46-0.76)  | 0.62 (0.48-0.80)  |
| Mixed or multiple ethnic groups | 1.26 (0.52-3.02) | 1.3 (0.54-3.12)  | 0.72 (0.38-1.40) | 0.79 (0.41-1.51) | 1.16 (0.69-1.96)  | 1.20 (0.71-2.04)  | 0.23 (0.08-0.72)  | 0.24 (0.08-0.75)  |
| Pakistani                       | 2.11 (1.52-2.92) | 1.72 (1.24-2.38) | 0.69 (2.73-3.72) | 2.69 (2.31-3.14) | 2.93 (2.47-3.49)  | 2.74 (2.30-3.25)  | 1.35 (1.06-1.72)  | 1.25 (0.98-1.59)  |
| Indian                          | 1.13 (0.64-1.99) | 0.98 (0.56-1.73) | 0.73 (0.78-1.52) | 0.98 (0.70-1.38) | 0.74 (0.48-1.15)  | 0.72 (0.46-1.12)  | 0.76 (0.50-1.15)  | 0.73 (0.48-1.11)  |
| Bangladeshi                     | 0 (0,inf)        | 0 (0-inf)        | 3.19 (1.65-5.69) | 3.71 (2.00-6.90) | 1.67 (0.70-4.02)  | 1.85 (0.77-4.44)  | 0.95 (0.31-2.95)  | 1.05 (0.34-3.25)  |
| Chinese                         | 0.50 (0.21-1.21) | 0.47 (0.20-1.13) | 1.09 (0.42-1.02) | 0.63 (0.40-0.99) | 0.49 (0.28-0.86)  | 0.48 (0.27-0.85)  | 0.71 (0.45-1.11)  | 0.70 (0.45-1.10)  |
| Other Asian                     | 3.98 (2.61-6.06) | 3.93 (2.58-5.99) | 3.06 (0.81-1.90) | 1.31 (0.85-2.01) | 0.70 (0.39-1.27)  | 0.73 (0.40-1.32)  | 0.99 (0.60-1.61)  | 1.02 (0.63-1.67)  |
| African                         | 2.46 (1.39-4.33) | 2.30 (1.30-4.05) | 0.65 (1.25-2.62) | 1.82 (1.25-2.64) | 1.94 (1.35-2.77)  | 1.98 (1.38-2.83)  | 0.45 (0.21-0.94)  | 0.45 (0.22-0.95)  |
| Caribbean                       | 1.02 (0.26-4.10) | 1.05 (0.26-4.20) | 1.24 (0.58-2.56) | 1.31 (0.63-2.75) | 1.03 (0.43-2.47)  | 1.06 (0.44-2.55)  | 0.38 (0.10-1.53)  | 0.40 (0.10-1.58)  |
| Arab                            | 0.43 (0.06-3.04) | 0.41 (0.06-2.91) | 1.81 (1.07-3.18) | 1.84 (1.07-3.17) | 1.90 (1.08-3.34)  | 1.90 (1.08-3.35)  | 0.90 (0.41-2.01)  | 0.90 (0.41-2.01)  |
| Other Ethnic Group              | 0.52 (0.07-3.69) | 0.50 (0.07-3.52) | 1.85 (0.70-2.80) | 1.41 (0.71-2.83) | 1.85 (0.96-3.56)  | 1.87 (0.97-3.60)  | 0.39 (0.10-1.55)  | 0.39 (0.10-1.56)  |
| COVID-19 death                  |                  |                  |                  |                  |                   |                   |                   |                   |
|                                 | Wave 1           |                  | Wave 2           |                  | Wave 3            |                   | Wave 4            |                   |
|                                 | 1(ref)           | 1(ref)           | 1(ref)           | 1(ref)           | 1(ref)            | 1(ref)            | 1(ref)            | 1(ref)            |
| White Scottish                  |                  |                  |                  |                  |                   |                   |                   |                   |
| White Other British             | 0.64 (0.55-0.73) | 0.78 (0.68-0.90) | 0.53 (0.47-0.60) | 0.67 (0.59-0.76) | 0.66 (0.55-0.79)  | 0.74 (0.62-0.89)  | 0.62 (0.52-0.74)  | 0.67 (0.56-0.81)  |
| White Irish                     | 0.99 (0.75-1.32) | 0.85 (0.64-1.12) | 0.89 (0.69-1.14) | 0.77 (0.60-0.99) | 0.66 (0.41-1.06)  | 0.62 (0.39-1.00)  | 1.00 (0.70-1.43)  | 0.94 (0.65-1.34)  |
| White Gypsy/Traveller           | 0.00 (0.00-Inf)  | 0.00 (0.00-Inf)  | 1.10 (0.27-4.38) | 1.18 (0.30-4.74) | 3.73 (1.20-11.58) | 3.87 (1.25-12.02) | 5.36 (2.01-14.31) | 5.49 (2.06-14.65) |
| White Polish                    | 0.35 (0.09-1.39) | 0.35 (0.09-1.41) | 0.11 (0.02-0.77) | 0.12 (0.02-0.85) | 2.81 (1.65-4.79)  | 2.99 (1.75-5.09)  | 0.70 (0.23-2.19)  | 0.74 (0.24-2.30)  |



|                                 |                   |                  |                  |                  |                  |                  |                   |                   |
|---------------------------------|-------------------|------------------|------------------|------------------|------------------|------------------|-------------------|-------------------|
| Other White                     | 0.61 (0.38-0.97)  | 0.62 (0.39-0.98) | 0.70 (0.49-0.99) | 0.75 (0.52-1.06) | 0.69 (0.40-1.19) | 0.72 (0.42-1.25) | 0.62 (0.35-1.09)  | 0.64 (0.37-1.14)  |
| Mixed or multiple ethnic groups | 2.23 (0.93-5.36)  | 2.25 (0.94-5.42) | 0.82 (0.27-2.55) | 0.88 (0.28-2.74) | 1.15 (0.29-4.61) | 1.19 (0.30-4.77) | 0.63 (0.09-4.45)  | 0.65 (0.09-4.64)  |
| Pakistani                       | 1.95 (1.30-2.95)  | 1.52 (1.01-2.29) | 2.45 (1.82-3.28) | 2.04 (1.52-2.74) | 3.31 (2.26-4.84) | 3.06 (2.09-4.49) | 1.77 (1.04-2.99)  | 1.66 (0.98-2.81)  |
| Indian                          | 0.93 (0.44-1.94)  | 0.75 (0.36-1.58) | 1.11 (0.64-1.92) | 0.96 (0.56-1.65) | 0.97 (0.40-2.34) | 0.92 (0.38-2.22) | 0.19 (0.03-1.37)  | 0.18 (0.03-1.31)  |
| Bangladeshi                     | 1.41 (0.20-10.02) | 1.34 (0.19-9.49) | 0.91 (0.13-6.47) | 0.97 (0.14-6.86) | 0.00 (0.00-Inf)  | 0.00 (0.00-Inf)  | 2.05 (0.29-14.60) | 2.15 (0.30-15.27) |
| Chinese                         | 1.23 (0.64-2.37)  | 1.07 (0.56-2.07) | 1.25 (0.74-2.12) | 1.19 (0.70-2.00) | 1.25 (0.56-2.78) | 1.22 (0.55-2.73) | 0.41 (0.10-1.65)  | 0.41 (0.10-1.64)  |
| Other Asian                     | 2.19 (0.98-4.88)  | 2.05 (0.92-4.57) | 1.73 (0.87-3.47) | 1.75 (0.87-3.50) | 0.86 (0.22-3.46) | 0.89 (0.22-3.56) | 0.99 (0.25-3.97)  | 1.02 (0.25-4.08)  |
| African                         | 0.00 (0.00-Inf)   | 0.00 (0.00-Inf)  | 1.11 (0.41-2.95) | 1.07 (0.40-2.85) | 1.00 (0.25-4.02) | 1.02 (0.25-4.08) | 0.00 (0.00-0.00)  | 0.00 (0.00-0.00)  |
| Caribbean                       | 0.00 (0.00-Inf)   | 0.00 (0.00-Inf)  | 1.54 (0.50-4.77) | 1.61 (0.52-5.01) | 0.00 (0.00-Inf)  | 0.00 (0.00-Inf)  | 2.38 (0.59-9.52)  | 2.46 (0.62-9.85)  |
| Arab                            | 0.00 (0.00-Inf)   | 0.00 (0.00-Inf)  | 0.90 (0.22-3.59) | 0.89 (0.22-3.55) | 0.93 (0.13-6.59) | 0.93 (0.13-6.60) | 2.11 (0.53-8.43)  | 2.13 (0.53-8.53)  |
| Other Ethnic Group              | 0.00 (0.00-Inf)   | 0.00 (0.00-Inf)  | 0 (0,inf)        | 0 (0,inf)        | 1.12 (0.16-7.93) | 1.13 (0.16-8.02) | 2.46 (0.61-9.83)  | 2.49 (0.62-9.98)  |
| <b>Positive SARS-CoV-2 test</b> |                   |                  |                  |                  |                  |                  |                   |                   |
|                                 | <b>Wave 1</b>     |                  | <b>Wave 2</b>    |                  | <b>Wave 3</b>    |                  | <b>Wave 4</b>     |                   |
| White Scottish                  | 1(ref)            | 1(ref)           | 1(ref)           | 1(ref)           | 1(ref)           | 1(ref)           | 1(ref)            | 1(ref)            |
| White Other British             | 0.71 (0.66-0.76)  | 0.80 (0.74-0.86) | 0.56 (0.55-0.58) | 0.67 (0.66-0.69) | 0.71 (0.70-0.72) | 0.76 (0.74-0.77) | 0.77 (0.76-0.78)  | 0.83 (0.82-0.84)  |
| White Irish                     | 1.15 (1.00-1.33)  | 1.08 (0.93-1.25) | 0.95 (0.90-1.01) | 0.89 (0.84-0.94) | 1.07 (1.03-1.11) | 1.04 (1.00-1.07) | 1.00 (0.97-1.03)  | 0.97 (0.94-1.00)  |
| White Gypsy/Traveller           | 0.34 (0.11-1.07)  | 0.35 (0.11-1.09) | 1.15 (0.96-1.37) | 1.25 (1.05-1.49) | 0.74 (0.65-0.85) | 0.76 (0.66-0.87) | 0.68 (0.60-0.76)  | 0.70 (0.62-0.79)  |
| White Polish                    | 0.91 (0.74-1.10)  | 0.93 (0.76-1.13) | 1.06 (1.01-1.11) | 1.19 (1.13-1.25) | 0.84 (0.82-0.87) | 0.86 (0.84-0.89) | 0.97 (0.94-0.99)  | 1.00 (0.98-1.03)  |
| Other White                     | 0.73 (0.62-0.86)  | 0.75 (0.64-0.89) | 0.62 (0.58-0.65) | 0.68 (0.65-0.72) | 0.70 (0.68-0.72) | 0.72 (0.69-0.74) | 0.72 (0.70-0.74)  | 0.75 (0.73-0.77)  |
| Mixed or multiple ethnic groups | 1.01 (0.71-1.45)  | 1.01 (0.71-1.45) | 0.76 (0.68-0.84) | 0.79 (0.71-0.87) | 0.80 (0.75-0.85) | 0.80 (0.75-0.85) | 0.83 (0.78-0.87)  | 0.84 (0.80-0.89)  |
| Pakistani                       | 1.27 (1.06-1.51)  | 1.12 (0.94-1.33) | 2.42 (2.34-2.51) | 2.09 (2.02-2.16) | 0.93 (0.89-0.96) | 0.86 (0.83-0.90) | 0.67 (0.65-0.69)  | 0.63 (0.61-0.65)  |
| Indian                          | 3.19 (2.75-3.71)  | 2.96 (2.55-3.44) | 1.42 (1.34-1.52) | 1.34 (1.26-1.43) | 0.74 (0.70-0.78) | 0.72 (0.68-0.76) | 0.79 (0.76-0.83)  | 0.78 (0.75-0.82)  |
| Bangladeshi                     | 1.69 (0.94-3.06)  | 1.75 (0.97-3.15) | 1.59 (1.35-1.87) | 1.93 (1.63-2.27) | 0.79 (0.68-0.91) | 0.82 (0.71-0.95) | 0.64 (0.56-0.74)  | 0.69 (0.61-0.79)  |
| Chinese                         | 0.37 (0.24-0.58)  | 0.35 (0.22-0.55) | 0.45 (0.40-0.50) | 0.43 (0.38-0.49) | 0.36 (0.33-0.39) | 0.35 (0.32-0.38) | 0.52 (0.49-0.55)  | 0.52 (0.49-0.55)  |
| Other Asian                     | 5.43 (4.71-6.25)  | 5.39 (4.68-6.21) | 1.38 (1.27-1.49) | 1.42 (1.31-1.53) | 0.61 (0.57-0.66) | 0.61 (0.57-0.66) | 0.87 (0.83-0.92)  | 0.91 (0.86-0.95)  |

|                    |                  |                  |                  |                  |                  |                  |                  |                  |
|--------------------|------------------|------------------|------------------|------------------|------------------|------------------|------------------|------------------|
| African            | 2.32 (1.88-2.88) | 2.21 (1.79-2.74) | 1.21 (1.12-1.30) | 1.17 (1.08-1.27) | 0.81 (0.76-0.86) | 0.80 (0.75-0.85) | 0.75 (0.71-0.79) | 0.74 (0.70-0.78) |
| Caribbean          | 1.17 (0.66-2.05) | 1.16 (0.66-2.05) | 0.85 (0.70-1.02) | 0.87 (0.72-1.05) | 0.78 (0.69-0.88) | 0.77 (0.68-0.87) | 0.93 (0.85-1.03) | 0.94 (0.85-1.03) |
| Arab               | 1.16 (0.70-1.93) | 1.09 (0.66-1.81) | 1.22 (1.07-1.39) | 1.18 (1.04-1.35) | 0.78 (0.71-0.87) | 0.76 (0.69-0.84) | 0.61 (0.55-0.67) | 0.60 (0.55-0.66) |
| Other Ethnic Group | 1.16 (0.64-2.10) | 1.12 (0.62-2.02) | 1.13 (0.95-1.34) | 1.11 (0.93-1.32) | 0.75 (0.66-0.86) | 0.74 (0.64-0.84) | 0.71 (0.63-0.80) | 0.71 (0.64-0.80) |

HR (95%CI) = Hazard ratio (95% Confidence Interval)- wave 1: March 1, 2020 to July 31, 2020- wave 2: August 1, 2020 to April 30, 2021- wave 3: May 1, 2021 to December 17, 2021- wave 4 : December 18, 2021 to April 17, 2022
